1 **Upregulation and cell specificity of C<sub>4</sub> genes are derived from ancestral C<sub>3</sub> gene**  
2 **regulatory networks**

3

4

5

6 Pallavi Singh<sup>#</sup>, Sean R. Stevenson<sup>#</sup>, Ivan Reyna-Llorens, Gregory Reeves, Tina B. Schreier  
7 and Julian M. Hibberd<sup>\*</sup>

8

9

10 Department of Plant Sciences, University of Cambridge, Downing street, Cambridge CB2  
11 3EA, United Kingdom.

12

13 <sup>\*</sup>Correspondence to [jmh65@cam.ac.uk](mailto:jmh65@cam.ac.uk)

14 <sup>#</sup>Both authors contributed equally

15

16 **KEY WORDS**

17 C<sub>4</sub> photosynthesis, light, de-etiolation, transcriptome, DNaseI-SEQ, *cis*-elements, light-  
18 responsive elements, *Gynandropsis gynandra*.

19

20 **RUNNING TITLE:** Transcriptional regulatory landscape in de-etiolating *Gynandropsis*  
21 *gynandra* seedlings.

22 **ABSTRACT**

23 The efficient C<sub>4</sub> pathway is based on strong up-regulation of genes found in C<sub>3</sub> plants, but  
24 also compartmentation of their expression into distinct cell-types such as the mesophyll and  
25 bundle sheath. Transcription factors associated with these phenomena have not been  
26 identified. To address this, we undertook genome-wide analysis of transcript accumulation,  
27 chromatin accessibility and transcription factor binding in C<sub>4</sub> *Gynandropsis gynandra*. From  
28 these data, two models relating to the molecular evolution of C<sub>4</sub> photosynthesis are  
29 proposed. First, increased expression of C<sub>4</sub> genes is associated with increased binding by  
30 MYB-related transcription factors. Second, mesophyll specific expression is associated with  
31 binding of homeodomain transcription factors. Overall, we conclude that during evolution of  
32 the complex C<sub>4</sub> trait, C<sub>4</sub> cycle genes gain *cis*-elements that operate in the C<sub>3</sub> leaf such that  
33 they become integrated into existing gene regulatory networks associated with cell specificity  
34 and photosynthesis.

## 35 INTRODUCTION

36 Photosynthesis fuels life on Earth and in the majority of land plants, Ribulose 1,5-  
37 bisphosphate Carboxylase Oxygenase (RuBisCO) catalyses the initial fixation of  
38 atmospheric carbon-dioxide (CO<sub>2</sub>) to generate phosphoglyceric acid (PGA). However,  
39 oxygen (O<sub>2</sub>) can competitively bind to the RuBisCO active site to form a toxic product 2-  
40 phosphoglycolate<sup>1</sup>. 2-phosphoglycolate can be metabolised at the expense of carbon and  
41 energy by photorespiration<sup>2,3</sup>. It is thought that to reduce rates of photorespiration, many  
42 plant lineages have evolved carbon concentrating mechanisms. C<sub>4</sub> photosynthesis is one  
43 such example and is characterised by compartmentation of photosynthesis, typically  
44 between mesophyll and bundle sheath cells<sup>4</sup>. This compartmentalisation involves cell-  
45 preferential gene expression and allows increased concentrations of CO<sub>2</sub> to be supplied to  
46 the RuBisCO sequestered in bundle sheath cells<sup>5</sup>. Rather than RuBisCO initially fixing  
47 carbon, in C<sub>4</sub> species fixation is initiated by phospho*eno*/pyruvate carboxylase (PEPC)  
48 combining HCO<sub>3</sub><sup>-</sup> to form a C<sub>4</sub> acid in mesophyll cells. Diffusion of C<sub>4</sub> acids into bundle  
49 sheath cells and subsequent decarboxylation results in elevated partial pressures of CO<sub>2</sub>  
50 around RuBisCO facilitating efficient carboxylation and reducing the requirement for  
51 significant rates of photorespiration.

52 C<sub>4</sub> photosynthesis results in higher water and nitrogen use efficiencies compared with the  
53 C<sub>3</sub> state, particularly in dry and hot climates. C<sub>4</sub> crops of major economic importance include  
54 maize (*Zea mays*), sugarcane (*Saccharum officinarum*), sorghum (*Sorghum bicolor*), pearl  
55 millet (*Pennisetum glaucum*) and finger millet (*Setaria italica*)<sup>6</sup>. Although C<sub>4</sub> photosynthesis  
56 is a complex trait characterized by changes in anatomy, biochemistry and gene expression<sup>4</sup>  
57 it has evolved convergently from C<sub>3</sub> ancestors in around 62 independent lineages that  
58 together account for ~8,100 species<sup>7</sup>. During the evolution of C<sub>4</sub> photosynthesis, parsimony  
59 would therefore imply that gene networks underpinning this system are derived from those  
60 that operate in C<sub>3</sub> ancestors.

61 Compared with the ancestral C<sub>3</sub> state, expression of genes encoding components of the  
62 C<sub>4</sub> pathway are restricted more precisely to either mesophyll or bundle sheath cells, and also  
63 upregulated. Our present understanding of these changes to C<sub>4</sub> gene regulation is mostly  
64 based on studies designed to understand the regulation of individual C<sub>4</sub> genes<sup>8</sup>. For  
65 example, a number of *cis*-regulatory motifs controlling the cell preferential expression of C<sub>4</sub>-  
66 genes have been identified<sup>9-15</sup>. Whilst some *cis*-elements appear to have evolved *de novo* in  
67 C<sub>4</sub> genes to pattern their expression<sup>16-20</sup>, others appear to have been recruited from pre-  
68 existing elements present in C<sub>3</sub> orthologs<sup>12-15</sup> and in these cases there is evidence that  
69 individual *cis*-elements are shared between multiple C<sub>4</sub> genes. In contrast to the analysis of  
70 regulators of cell specific expression, there is much less work on mechanisms that underpin  
71 the upregulation of genes important for the C<sub>4</sub> pathway compared with the ancestral C<sub>3</sub>

72 state. One possibility is that *cis*-elements referred to as Light Responsive Elements (LREs)  
73 that have been characterized in photosynthesis genes in  $C_3$  plants e.g. *CAB* (chlorophyll a/b  
74 binding proteins), *PC* (plastocyanin) and *RBCS* (small subunit of RuBisCO)<sup>21,22</sup> are acquired  
75 by genes of the core  $C_4$  pathway. Indeed, whilst many  $C_4$  pathway components and their  
76 orthologs in  $C_3$  species show light-dependant induction<sup>23</sup>, the mechanisms driving these  
77 patterns are still largely unknown.

78 The response of a seedling to light is the first major step towards photosynthetic maturity.  
79 The growth of seedlings in prolonged darkness leads to the development of etioplasts in  
80 place of chloroplasts<sup>24</sup>. Etioplasts lack chlorophyll but contain membranes composed of a  
81 paracrystalline lipid–pigment–protein structure known as the prolamellar body (PLB)<sup>25–29</sup>. De-  
82 etiolation of seedlings therefore marks the initiation of photosynthesis and presents a good  
83 model system to study the dynamics and regulatory mechanisms governing photosynthesis  
84 in both  $C_3$  and  $C_4$  species. The establishment of photosynthesis has been shown to involve  
85 two phases including an initial change in gene expression following light induction together  
86 with accompanying metabolic and structural changes to the chloroplast. A second phase  
87 involves maturation of the chloroplast and a tight coordination between chloroplast and  
88 nuclear genomes<sup>30</sup>. Here we used a genome-wide approach to better understand the  
89 patterns of transcript abundance and potential regulatory mechanisms responsible for these  
90 behaviours underpinning  $C_4$  photosynthesis. By carrying out DNaseI-SEQ and coupling it  
91 with profiling of transcript abundance during de-etiolation of *Gynandropsis gynandra*  
92 seedlings, we aimed to provide insights into the transcription factor binding repertoire and  
93 the dynamics of gene expression associated with the establishment of  $C_4$  photosynthesis.  
94 Further, we undertook comparative analysis using an analogous dataset from  $C_3$   
95 *Arabidopsis thaliana* (hereafter *Arabidopsis*) to compare the extent to which regulatory  
96 mechanisms are shared between the ancestral  $C_3$  and derived  $C_4$  systems.

97 Our data link changes in chromatin accessibility and transcription factor binding to  
98 patterns of gene expression and assembly of the photosynthetic apparatus in the  $C_4$  species  
99 *G. gynandra*. During de-etiolation, assembly of the photosynthetic apparatus was initiated  
100 within two hours of exposure to light. Transcript profiling revealed a global remodelling of  
101 gene expression associated with the dark-to-light transition. Many genes associated with  
102 core photosynthetic processes shared by  $C_3$  and  $C_4$  plants, as well as those specifically  
103 encoding components of  $C_4$  photosynthesis showed similar dynamics during this dark-to-  
104 light transition. During the first two hours of exposure to light, a relatively large restructuring  
105 of open chromatin and a shift from transcription factor binding in exons to promoters and 5'  
106 UTRs took place. All genes encoding core proteins of the  $C_4$  pathway were more strongly  
107 induced after exposure to light in  $C_4$  *G. gynandra* compared with  $C_3$  *Arabidopsis*. The greater  
108 induction of  $C_4$  pathway genes in *G. gynandra* was associated with gain of light responsive



109 elements such as EE and I-boxes, but also the C2C2-GATA box that regulates  
110 photosynthesis-associated nuclear genes (PhANGs). Moreover, binding of transcription  
111 factors *in vivo* to these sites was detected. Second, C<sub>4</sub> genes expressed in mesophyll cells  
112 gained homeodomain and LOB/AS2 binding sites that were also bound in the C<sub>4</sub> leaf. In  
113 addition to the increased number and binding to such sites in C<sub>4</sub> genes of *G. gynandra*  
114 compared with Arabidopsis, strong expression of *ANL2* which belongs to the homeodomain  
115 family and is preferentially expressed in mesophyll cells was detected. We conclude that the  
116 evolution of C<sub>4</sub> photosynthesis is associated with rewiring of photosynthesis gene regulatory  
117 networks that exist in the C<sub>3</sub> state such that they expand to include genes encoding C<sub>4</sub>  
118 enzymes.

## 119 **RESULTS**

### 120 **De-etiolation and chloroplast development in *C<sub>4</sub> Gynandropsis gynandra***

121 The dynamics associated with unfolding of the apical hook, chlorophyll accumulation, and  
122 ultrastructural re-arrangements of chloroplasts were determined as etiolated seedlings of  
123 *Gynandropsis gynandra* were transferred from dark-to-light. The classical photomorphogenic  
124 responses of apical hook unfolding and greening of cotyledons were visible 2 hours after  
125 transfer to light (Fig. 1a). Chlorophyll quantification indicated that accumulation was  
126 detectable by 0.5 hours after exposure to light, and that an initial exponential phase was  
127 followed by a more linear increase (Fig. 1b). Little additional chlorophyll was synthesized  
128 from 12 to 24 hours after first exposure to light (Fig. 1b). Assembly of the photosynthetic  
129 membranes in chloroplasts from mesophyll and bundle sheath cells, both of which are  
130 involved in  $C_4$  photosynthesis, was apparent over this time course (Fig. 1c-d). In the dark,  
131 prolamellar bodies dominated the internal space of chloroplasts in each cell type. After 0.5  
132 hours of exposure to light, although prolamellar bodies were still evident, they had started to  
133 disperse. Starch grains were apparent in bundle sheath chloroplasts by 24 hours after  
134 exposure to light, and it was noticeable that thylakoids showed low stacking in this cell type  
135 (Fig. 1c-d, Supplementary Fig. 1). Overall, these data indicate that in *G. gynandra*, assembly  
136 of the photosynthetic apparatus was initiated within 0.5 hours of exposure to light and by 24  
137 hours the apparatus appeared fully functional. To better understand the patterns of gene  
138 expression and the transcriptional regulation that underpin this induction of  $C_4$   
139 photosynthesis, these early time points were selected for detailed molecular analysis.

140

### 141 **Induction of photosynthesis genes in *G. gynandra***

142 To investigate how transcript abundance changed during the induction of  $C_4$   
143 photosynthesis, mRNA from three biological replicates at 0, 0.5, 2, 4, and 24 hours after  
144 exposure to light was isolated and used for RNA-SEQ. On average, 10 million reads were  
145 obtained and ~25,000 transcripts detected per sample (Supplementary Table 1). We were  
146 primarily interested in the dynamics of gene expression throughout de-etiolation and so we  
147 analysed how transcript abundance changed relative to each previous time point. To provide  
148 a conservative estimate for the number of transcripts that were differentially expressed  
149 between consecutive time points, two independent algorithms were used and the intersect  
150 between these datasets determined (Supplementary Table 1). This showed that by far the  
151 greatest difference in transcript abundance was detected 0.5 hours after transfer from dark-  
152 to-light (number differentially expressed = 4609). At subsequent time points, the number of  
153 differentially expressed transcripts ranged from 1861 (4 hours versus 2 hours) to 2452 (24  
154 hours versus 4 hours), and so was always less than half the number associated with the first  
155 0.5 hours of exposure to light (Supplementary Table 1). Principle component analysis (PCA)

156 showed that replicates from each timepoint clustered together tightly, and that 64% of the  
157 variance in transcript abundance could be explained by two main components. The first  
158 component accounted for 46% of the variance and was associated with the dark-to-light  
159 transition (Fig. 2a). To better understand the general patterns of differentially expressed  
160 genes (Supplementary Table 2), Gene Ontology (GO) terms were assessed (Fig. 2b,  
161 Supplementary Fig. 2,  $FDR < 10^{-5}$ ). Compared with each previous time point, upregulated  
162 genes in samples taken at 0.5 and 24 hours showed enrichment in GO terms including those  
163 related to the plastid, as well as carbohydrate, secondary, nitrogen and lipid metabolism, but  
164 also responses to light and photosynthesis. These components were also over-represented  
165 in genes down-regulated at 2 and 4-hour time points suggesting two phases of  
166 photosynthetic induction. Overall, these pairwise comparisons of transcript abundance  
167 between samples, the PCA and the GO term enrichment analysis are consistent with a  
168 major remodelling of gene expression after 0.5 hours of exposure to light, at least in part  
169 associated with establishment of photosynthesis.

170 To better understand the dynamics of gene expression associated with the induction of  
171 chlorophyll accumulation and remodelling of chloroplast ultrastructure in the  $C_4$  leaf (Fig. 1),  
172 genes associated with photosynthesis were subjected to hierarchical clustering. The genes  
173 defined as such were  $C_4$  pathway genes as well as orthologs to nuclear genes from  
174 *Arabidopsis* annotated with the photosynthesis-related GO term (GO:0015979). A total of  
175 116 genes were clustered into three main groups. Cluster I (red, Fig. 2c) showed no clear  
176 induction over the time-course, but clusters II and III (yellow and green respectively, Fig. 2c)  
177 contained the majority of genes ( $n=76$ ) and showed clear induction by 24 hours. Notably,  $C_4$   
178 pathway genes were dispersed among these clusters, with 67% of  $C_4$  photosynthesis genes  
179 ( $n=20$ ) found in clusters II and III (Fig. 2c). There are multiple paralogs of various  $C_4$  cycle  
180 genes of which ten showed no clear induction in response to light (Cluster I). However, the  
181 majority of these non-induced members were poorly expressed, and at least one other  
182 paralog was strongly induced and so present in Cluster II and III. Overall, these data show  
183 that the majority of  $C_4$  cycle genes populated photosynthesis gene clusters that showed  
184 increased expression during de-etiolation (Fig. 2c).

185 To identify candidate transcription factors that may be responsible for the induction of  
186 photosynthesis gene expression in response to light, four classes were identified on the  
187 basis of changes in their transcript abundance. Transcription factors that act as positive  
188 regulators of photosynthesis would be expected to show either a steady increase and  
189 positive correlation ( $>0.8$  Pearson Correlation across time-course) with induced  
190 photosynthesis genes (clusters II and III from Fig. 2c), or an early burst at 0.5 hours (Fig.  
191 2d). Repressors would be expected to show the opposite trends (Fig. 2d). This approach  
192 identified twenty-one transcription factors that were strongly and positively correlated with

193 photosynthesis genes (Supplementary Table 3). Candidates in this class were often related  
194 to previously characterised regulators of photomorphogenesis, plastid development, light  
195 and circadian networks as well as components of cell fate determination and sucrose  
196 signalling in Arabidopsis. Twenty-six transcription factors showed a strong and specific  
197 induction at 0.5 hours (Supplementary Table 3). Again, these encoded homologs to proteins  
198 previously implicated in the circadian clock, de-etiolation and chloroplast greening  
199 components. For example, two orthologs of *ELONGATED HYPOCOTYL 5 (HY5)*, a master  
200 regulator of de-etiolation and *LATE ELONGATED HYPOCOTYL (LHY)*, a key clock  
201 component<sup>31</sup> were among this group. Sixty-two transcription factors were strongly negatively  
202 correlated with transcripts of induced photosynthesis genes, and these included an ortholog  
203 of *PHYTOCHROME INTERACTING FACTOR7 (PIF7)*, a negative regulator of phytochrome  
204 B-mediated seedling de-etiolation<sup>32</sup>. This group also contained seventeen transcription  
205 factors associated with hormone signalling and ten containing a homeodomain  
206 (Supplementary Table 3). Finally, twenty-two transcription factors were identified as showing  
207 an early and specific downregulation with the majority connected to developmental  
208 processes, often organ development (Supplementary Table 3). These four classes of  
209 transcription factors therefore contain members consistent with analysis from other systems  
210 and so appear to represent conserved *trans*-factors associated with de-etiolation in general.  
211 Taken together, the data indicate that as in C<sub>3</sub> plants, a global remodelling of gene  
212 expression is associated with the dark-to-light transition in C<sub>4</sub> *G. gynandra*. Moreover, many  
213 genes associated with core photosynthetic processes shared by C<sub>3</sub> and C<sub>4</sub> plants, as well as  
214 those specifically encoding components of C<sub>4</sub> photosynthesis showed similar dynamics  
215 during this transition. We conclude that the process of de-etiolation provides an attractive  
216 system to start to define gene regulatory networks that control the induction of C<sub>4</sub>  
217 photosynthesis. As the regulation of gene expression is highly combinatorial, to identify  
218 potential regulators of this process we opted for an unbiased genome-wide approach to  
219 assess chromatin accessibility as well as transcription factor-DNA interactions during de-  
220 etiolation.

221

### 222 **Chromatin dynamics associated with de-etiolation in *G. gynandra***

223 To gain insight into how chromatin accessibility and *cis*-elements bound by transcription  
224 factors within such regions change during de-etiolation of *G. gynandra*, nuclei from three  
225 biological replicates across the five time points were treated with DNase-I and subjected to  
226 sequencing. From these time-points, a total of 1,145,530,978 reads were mapped to the *G.*  
227 *gynandra* genome, and 795,017 DNaseI-hypersensitive sites (DHSs) representing broad  
228 regulatory regions accessible to transcription factor binding were identified (Fig. 3a,  
229 Supplementary Fig. 3). The average length of these DHSs was ~610 base pairs, and

230 distribution plots showed that their density was highest at the predicted transcription start  
231 sites (Fig. 3b). However, over the time-course the peak DHS density at transcription start  
232 sites altered such that compared with the dark, it more than doubled by two hours after  
233 transfer to light (Fig. 3b). This is consistent with the notion that exposure to light leads to a  
234 rapid increase in open chromatin around gene bodies<sup>33</sup>. To further investigate the extent to  
235 which accessible chromatin changed over the entire time-course, the proportion of DHS that  
236 were shared between time-points was examined (Fig. 3c). There was a major re-  
237 organisation of DHS by 0.5 hours, with 64% changing compared with tissue harvested from  
238 the dark. This remodelling continued until 2 hours after exposure to light when 71% of DHS  
239 had changed compared with the dark (Fig. 3c). From 4 hours after exposure to light, the  
240 extent to which DHS were modified was less striking. These data therefore support the  
241 notion that during the first two hours of exposure to light when assembly of the  
242 photosynthetic apparatus is being initiated (Fig. 1a-d), a relatively large restructuring of open  
243 chromatin takes place, but subsequent to this, and coincident with photosynthetic maturation  
244 there are fewer changes in chromatin accessibility. We conclude that this major re-patterning  
245 of DHS in the first two hours after exposure to light likely contributes to the changes to  
246 mRNA abundance detected soon after the dark-to-light transition, and thus assembly of the  
247 photosynthetic apparatus.

248 Next, changes in accessibility to DHS specifically associated with photosynthesis, C<sub>4</sub>  
249 pathway genes and the two classes of transcription factors that were either positively or  
250 negatively correlated to photosynthesis genes (Fig. 2d) were assessed (Fig 3d). To  
251 understand the extent to which accessibility in each DHS set was altered, dDHS scores<sup>34</sup>  
252 were computed. These dDHS scores quantify the change in normalised cut frequency in  
253 DHS shared between samples. All sets showed broadly similar patterns across the time-  
254 course with the C<sub>3</sub> and C<sub>4</sub> gene DHSs showing particularly similar patterns (Fig. 3d). This  
255 was also the case for the differentially expressed genes at 0.5 hours where there was little  
256 association between increased accessibility, as defined by a positive dDHS score, and an  
257 increase in transcript abundance (Supplementary Fig. 4). This suggests that changes to the  
258 binding of specific transcription factors in these open regions of chromatin, rather than  
259 changes in accessibility *per se*, must drive the increased in gene expression as C<sub>4</sub>  
260 photosynthesis is initiated in *G. gynandra*.

261 To better understand transcription factor binding sites that may be involved in activating  
262 photosynthesis gene expression, DHSs associated within induced C<sub>3</sub> and C<sub>4</sub> photosynthesis  
263 genes (clusters II and III Fig. 2c) were selected and scanned for binding sites<sup>35,36</sup>. Two  
264 complementary algorithms were used from the MEME suite. The first was FIMO<sup>37</sup> which  
265 finds individual motif occurrences predicted to be of high affinity. The second was AME<sup>38</sup>,  
266 which determines the average odds scores across entire sequences and in so doing

267 considers lower affinity sites, many of which would not be detected with FIMO. Using FIMO  
268 we did not detect a strong correlation (Pearson's correlation of 0.0014) between motif  
269 frequencies against a random background set of DHSs in C<sub>3</sub> and C<sub>4</sub> photosynthesis genes  
270 (Fig. 3e). To identify which motifs occurred more often than by chance alone, AME was run  
271 for both the C<sub>3</sub> and C<sub>4</sub> cistromes against shuffled input sequences as a control  
272 (Supplementary Table 4). Although there was little overlap between AME and FIMO outputs,  
273 a group of bZIP (G-box binding) motifs were enriched in both datasets (Fig. 3e). These  
274 motifs represent Light Responsive Elements (LREs) first defined as multipartite *cis*-elements  
275 in the *RbcS* promoter<sup>22,39,40</sup>. This finding is consistent with the requirement for  
276 photosynthesis genes to be responsive to light and implies that induction of C<sub>4</sub> pathway  
277 genes during de-etiolation may in part be due to these LREs. AME also identified motifs that  
278 were enriched in the C<sub>4</sub> cistrome compared with the C<sub>3</sub> cistrome (orange points in Fig. 3e).  
279 This was dominated by homeodomain motifs (specifically those from the HD-Zip I family) as  
280 well as some GT-box related Trihelix motifs, MYB and MADs motifs. In summary, although  
281 there was no strong correlation between the cistromes of C<sub>3</sub> and C<sub>4</sub> photosynthesis genes  
282 from *G. gynandra*, a group of bZIP (G-box) motifs were enriched in both gene sets, and  
283 homeodomain motifs were enriched in the cistrome of C<sub>4</sub> genes compared with that of C<sub>3</sub>  
284 genes.

285

### 286 **A *cis*-regulatory atlas for de-etiolation in *G. gynandra***

287 Chromatin accessibility assays followed by *in silico* analysis of motifs within these regions  
288 identifies regulatory elements that could be important for gene regulation but does not  
289 indicate whether motifs are actually subject to transcription factor binding. We therefore  
290 carried out sequencing at sufficient depth to define DNA sequences that are protected from  
291 DNaseI digestion (Fig. 4a). Such sequences are diagnostic of strong and/or widespread  
292 protein binding and referred to as Digital Genomic Footprints (DGFs). Although DNaseI-SEQ  
293 has been used to predict transcription factor binding sites at base-pair resolution through  
294 DGF, the DNaseI enzyme possesses sequence bias that can lead to both type I and II errors  
295 in their identification and so to account for such bias, de-proteinated DNA was first  
296 analysed<sup>41,42</sup> (Supplementary Fig. 3). After this filtering, 300,091 DGFs corresponding to  
297 individual transcription factor binding sites across all time points were identified (Fig. 4a and  
298 Supplementary Fig. 3). This compares favourably with 282,030 DGFs in a publicly available  
299 dataset for de-etiolation of *Arabidopsis*<sup>43</sup> that was less conservative as the naked DNaseI  
300 filtering steps were not undertaken. To provide an overview of transcription factors likely  
301 binding these DGFs, all were scanned for 948 known *Arabidopsis* motifs. To be  
302 conservative, each DGF was only annotated to its top match.



303 The distribution of DGFs in gene features (e.g., promoters, exons, introns and UTRs) of  
304 *G. gynandra* changed during de-etiolation (Fig. 4b). Notably, in the first two hours of  
305 exposure to light, DGF density in promoter elements (defined as sequence two kilobase  
306 pairs upstream of predicted transcriptional start sites) and 5' UTRs increased (from 11 to  
307 19% in the case of promoters and 27 to 41% for 5' UTRs). This finding is consistent with the  
308 increase in DHS density around predicted transcriptional start sites at this time (Fig. 3a).  
309 Coincident with the increase in DGFs in promoters and 5' UTRs, the density found in coding  
310 sequence was reduced by around half (Fig. 4b). In contrast, the density of DGFs associated  
311 with introns and 3' UTRs changed little during de-etiolation. These findings suggest changes  
312 to binding site distribution between genomic features may play an important role in  
313 transcriptional regulation and contribute to the induction of photosynthesis during de-  
314 etiolation. To test this further, we correlated the change in frequency of each motif with  
315 expression of the proximal gene (Supplementary Table 5). Positive and negative correlations  
316 between motif frequency and gene expression were used to classify motifs as either allowing  
317 activation or repression. Of the motifs predicted to act as activators, which included a  
318 number of Cysteine-rich polycomb-like (CPP) factors, significantly more were located in  
319 promoters and introns. In contrast motifs predicted to act as repressors were significantly  
320 more likely, roughly twice, to be found in exons (Fig. 4c, Supplementary Table 5). Motifs  
321 found to have no correlation to targets (neutral) were found to have intermediate frequencies  
322 suggesting a gradient from the two extremes (Supplementary Table 5).

323 To understand the dynamics of motifs during de-etiolation, after filtering out low frequency  
324 motifs, 743 were subjected to hierarchical clustering (Fig. 4d). Whilst some clusters were  
325 dominated by a small number of transcription factor families such as DOFs (II), AP2s (III),  
326 WRKYs (VI) and TCPs (XI) (Fig. 4d) others were composed of motifs associated with  
327 multiple families of transcription factors suggesting that the binding sites of these unrelated  
328 transcription factors could be involved in similar networks during de-etiolation. One of the  
329 most striking clusters was dominated by TCP motifs (Cluster XI) which was depleted in dark-  
330 grown tissue but became more enriched at thirty minutes and then two hours after exposure  
331 to light. To varying degrees, clusters I to V showed a similar pattern to the TCP cluster,  
332 peaking between thirty minutes to four hours with lower levels at zero hours. These  
333 contained more C2H2 and NAC (cluster I), bZIP (cluster I and IV), DOF (cluster II), AP2  
334 (clusters III and IV) and bHLH (cluster IV) motifs. There were a few clusters, notably XVI and  
335 XVII, that were least represented at two hours and hence showed a broadly opposite  
336 dynamic. These large clusters are highly heterogeneous but included many MYB, MYB-  
337 related, GATA, G2-like, HSF and homeodomain motifs. Overall, the patterns indicate that  
338 certain groups of transcription factors are likely more involved at certain points during de-  
339 etiolation. In addition, many of these patterns appear to be complementary to one another

340 (such as XI with XVI and XVII) and so antagonistic interactions appear likely between  
341 members of clusters I to XI and XII to XVII.

342

343 **C<sub>4</sub> genes in C<sub>3</sub> *A. thaliana* are induced but with reduced amplitude compared with**  
344 **orthologs in C<sub>4</sub> *G. gynandra***

345 In order to gain insight into the extent to which C<sub>4</sub> gene expression has altered compared  
346 with the ancestral C<sub>3</sub> state, we compared the RNA-SEQ data and the *cis*-regulatory atlas  
347 collected for C<sub>4</sub> *G. gynandra* with an equivalent dataset from Arabidopsis<sup>43</sup> (Fig. 5a). As in *G.*  
348 *gynandra* (Fig. 2c), many photosynthesis-related genes in C<sub>3</sub> Arabidopsis showed increased  
349 transcript abundance after the dark-to-light transition and three major behaviours were  
350 evident (Fig. 5b). Cluster I (red) showed no clear change, Cluster II (yellow) showed  
351 moderate, while Cluster III (green) showed strong induction (Fig. 5b). Of the genes  
352 orthologous to C<sub>4</sub> pathway genes, nineteen showed no clear induction while six were  
353 moderately and only one was strongly induced (Fig. 5b). Therefore, whilst some C<sub>4</sub> genes  
354 showed induction in the ancestral state, this was by no means universal. Indeed, in  
355 Arabidopsis a higher proportion occupied the non-responding cluster (19/27) compared with  
356 *G. gynandra* (10/30). Whilst in *G. gynandra* seven occupied the most strongly responding  
357 cluster, only one did in Arabidopsis. We next normalised the transcript abundance data of  
358 both species to enable direct comparison of expression of C<sub>4</sub> genes from *G. gynandra* with  
359 orthologous groups from Arabidopsis (Supplementary Fig. 5). This indicated that all genes  
360 encoding core proteins of the C<sub>4</sub> pathway were more strongly induced after exposure to light  
361 in C<sub>4</sub> *G. gynandra* than in C<sub>3</sub> Arabidopsis (Fig. 5c). This is consistent with re-analysis of  
362 publicly available data for maize and rice de-etiolation<sup>44</sup> (Supplementary Fig. 6). Thus, whilst  
363 many C<sub>4</sub> pathway orthologs were induced in response to light in Arabidopsis the amplitude  
364 of this response was larger in *G. gynandra*.

365

366 **C<sub>4</sub> genes gain light responsive elements and motifs that regulate photosynthesis-**  
367 **associated nuclear genes in the C<sub>3</sub> state**

368 To investigate how C<sub>4</sub> genes become more responsive to light in *G. gynandra* compared  
369 with Arabidopsis, we first identified *cis*-elements in DHS associated with these genes from  
370 each species (the C<sub>4</sub> cistromes). As well as genes encoding the core C<sub>4</sub> pathway, we  
371 included photosynthesis genes that showed clear induction in response to light (the C<sub>3</sub>  
372 cistromes, see Fig. 2d). Using these gene sets allowed us to investigate the extent to which  
373 C<sub>4</sub> genes in *G. gynandra* share a *cis*-code with photosynthesis genes, and whether this code  
374 is also found in the C<sub>3</sub> ancestral state. As the number of each motif may vary between  
375 species due to phylogenetic distance, to allow interspecies comparison we ranked motif  
376 enrichment within each species. With the exception of some AP2 and LOB/AS2 motifs that



377 were abundant in *G. gynandra*, the *cis*-code of C<sub>3</sub> photosynthesis genes in both species was  
378 similar (Fig. 6a). In both species, the most enriched motifs located in DHS around C<sub>3</sub> genes  
379 included many bZIP (including HY5), bHLH (including PIF7) and BZR motifs (Supplementary  
380 Table 6). Interestingly, there was more similarity between the C<sub>3</sub> cistromes of Arabidopsis  
381 and *G. gynandra* (Fig. 6a) than between those of C<sub>3</sub> and C<sub>4</sub> genes from *G. gynandra* (Fig.  
382 6a). The Arabidopsis C<sub>3</sub> and C<sub>4</sub> cistromes were more similar than the C<sub>3</sub> and C<sub>4</sub> cistromes  
383 from *G. gynandra* (Fig. 6b) indicating that C<sub>4</sub> genes from *G. gynandra* have not acquired  
384 large numbers of *cis*-elements associated with C<sub>3</sub> photosynthesis genes of Arabidopsis.  
385 Lastly, the *cis*-code of C<sub>4</sub> genes from Arabidopsis and *G. gynandra* were very different (Fig.  
386 6c) strongly implying that as they are recruited into the C<sub>4</sub> pathway the regulation of these  
387 genes has diverged significantly. Collectively, these data indicate a greater divergence in  
388 motif composition of C<sub>4</sub> genes in these C<sub>3</sub> and C<sub>4</sub> species than between their C<sub>3</sub>  
389 photosynthesis genes.

390 We next assessed annotations associated with the top fifty motifs in the cistrome of C<sub>4</sub>  
391 genes from *G. gynandra* (Fig. 6d). Hierarchical clustering revealed two groups of particular  
392 interest. The first (green) contained motifs that were relatively highly ranked in all cistromes  
393 except C<sub>4</sub> genes from Arabidopsis. This group included YAB1 and CRC, as well as Class 1  
394 bZIP G- and E-box motifs (Fig. 6d&e). As C<sub>4</sub> genes from Arabidopsis were poorly induced  
395 during de-etiolation we propose that these motifs are strong candidates for the light induced  
396 expression of C<sub>4</sub> genes from *G. gynandra* as well as C<sub>3</sub> photosynthesis genes from both  
397 species. The second group (red) contained motifs that were highly ranked only in the C<sub>4</sub>  
398 cistrome of *G. gynandra*. This includes a number of TCP and homeodomain motifs as well  
399 as the GT-box binding trihelix motifs and Class II bZIP TGAs (Fig. 6d&e). The remaining  
400 motifs showed intermediate patterns and included further G-box binding Class 2 bZIP motifs,  
401 GT-box binding trihelix motifs, E-box binding BZR motifs and a number of homeodomain  
402 motifs (Fig. 6d&e). Class I and Class II bZIP G-box, E-box, GT-box, EEs and I-box all  
403 represent Light Responsive Elements (LREs). Class I G-boxes are bound by bZIP  
404 transcription factors, whilst Class II G-boxes are bound by the TGA subfamily (Fig. 6e). The  
405 E-box is recognised by the bHLH family of transcription factors, whilst the GT-box is bound  
406 by members of the Trihelix family of transcription factors. Lastly, Evening Elements (EEs)  
407 are recognised by the MYB-related CCA1/LHY subfamily while the I-box is recognised by  
408 another subfamily of less well characterised MYB-related factors.

409 As LREs were amongst the most enriched motifs in the cistrome of C<sub>4</sub> genes from *G.*  
410 *gynandra* compared with Arabidopsis, we next tested whether this difference was statistically  
411 significant and therefore could contribute to the gain in induction observed for the twelve  
412 core pathway components. PhANGs are also known to be regulated by transcription factors  
413 such as GLK, GNC1 and CGA1<sup>45,46</sup> and although they were not in the top fifty most enriched

414 motifs from C<sub>4</sub> genes of *G. gynandra*, we included motifs recognised by these PhANGs (Fig.  
415 6e) in our analysis. For the LREs, there was no enrichment in Class I and Class II G-boxes  
416 or E-boxes in C<sub>4</sub> genes from *G. gynandra* (adjusted p-value < 0.05) (Fig. 6f), and whilst there  
417 was increase in the number of GT-boxes this was not statistically significant (Fig. 6f).  
418 However, both EEs and I-boxes were statistically more common in C<sub>4</sub> genes of *G. gynandra*  
419 than their orthologs in *Arabidopsis* (adjusted p-values of 0.00286 and 0.047  
420 respectively) (Fig. 6f). Motifs recognised by GLK were very close to the  $p < 0.05$  cut-off  
421 (0.0535), and the increase in CGA1 and GNC1 (C2C2-GATA) binding sites in C<sub>4</sub> genes of *G.*  
422 *gynandra* compared with *Arabidopsis* was statistically significant (adjusted p-value 0.0134)  
423 (Fig. 6f). We interrogated the DGF datasets from each species to test whether *in vivo*  
424 binding for any of the LRE or PhANG motifs was detected. Although we did not detect more  
425 binding *in vivo* for the PhANGs in C<sub>4</sub> genes of *G. gynandra* compared with *Arabidopsis*, we  
426 did for both EEs and I-boxes recognised by MYB-related transcription factors (Fig. 6g).  
427 These data support a model in which increased binding of LREs in C<sub>4</sub> genes from *G.*  
428 *gynandra* drive their increased responsiveness to light compared with orthologs from  
429 *Arabidopsis*. It is possible that regulators of PhANGs such as CGA1 and GNC1 have a low  
430 affinity for their cognate *cis*-element and so binding cannot be detected with the DNaseI  
431 assay.

432 We also found increased binding of homeodomain and LOB/AS2 transcription factors to  
433 C<sub>4</sub> genes of *G. gynandra* (Fig. 6g, Supplementary Fig. 7). Given that more homeodomain  
434 sites were present in the cistrome of C<sub>4</sub> genes from *G. gynandra* (Fig. 6d), we sought to gain  
435 further understanding of their potential roles. The C<sub>4</sub> genes *BASS2*, *PPa6* and *PPDK*  
436 contained six DGF with significant matches to homeodomain motifs. These three genes are  
437 preferentially expressed in mesophyll cells of C<sub>4</sub> plants, and so we hypothesized that  
438 transcription factors able to bind these motifs would be more strongly expressed in the  
439 mesophyll. To address this, we used publicly available data<sup>47,48</sup> and found that transcripts  
440 derived from the Homeodomain-Zip IV (HD-Zip IV) subfamily (including *GLABRA2* and  
441 others with a wide range of functions) were more abundant in mesophyll cells from  
442 *Arabidopsis* and *G. gynandra*, whilst those from HD-Zip III subfamily (including vascular  
443 development and leaf polarity regulators such as *CORONA* and *PHABULOSA*) were more  
444 abundant in bundle sheath strands from both species (Supplementary Fig. 8). Hits for HD-  
445 Zip IV binding were detected in *BASS2* and *PPa6*, but the strongest match was a motif  
446 recognised by ANL2 in *PPDK*. As the *G. gynandra* ortholog of ANL2 was most abundant  
447 during de-etiolation, these data are consistent with ANL2 playing a role in driving mesophyll  
448 expressed C<sub>4</sub> genes in *G. gynandra*.

449 In summary, our data provide a genome-wide resource linking expression patterns to  
450 regulatory mechanisms during the establishment of C<sub>4</sub> photosynthesis. The distribution of  
451 transcription factor binding changed dramatically during de-etiolation with increased  
452 numbers of *cis*-elements in coding regions detected when genes were repressed. By  
453 combining expression, computational and *in vivo* transcription factor binding analysis, we  
454 propose two models relating to the molecular evolution of C<sub>4</sub> photosynthesis. First, the large  
455 increase in C<sub>4</sub> gene expression in *G. gynandra* compared with *Arabidopsis* is driven by  
456 acquisition of accessible LREs and motifs bound by the GNC and CGA1 transcription factors  
457 (Fig. 6h). For the EEs and I-box LREs, increased binding by transcription factors was  
458 detected *in planta*. Second, mesophyll preferential expression of genes such as *PPDK*,  
459 *BASS2* and *PPa6* is driven by a gain of motifs subject to binding by homeodomain (HD-Zip  
460 IV) transcription factors (Fig. 6h). Again, more binding to such *cis*-elements was detected *in*  
461 *planta*. To our knowledge, these data provides the first evidence based on chromatin  
462 accessibility and *in vivo* binding assays to link specific *cis*-elements and their cognate  
463 transcription factors with the evolution of C<sub>4</sub> photosynthesis.

## 464 **DISCUSSION**

### 465 **Using de-etiolation to understand the establishment of C<sub>4</sub> photosynthesis and the** 466 **etioplast to chloroplast transition in *G. gynandra***

467 Light is an important cue that triggers the onset of autotrophy after germination. Upon  
468 light perception, de-etiolation is initiated such that etioplasts found in dark-grown tissue  
469 transition to photosynthetically competent chloroplasts<sup>49</sup>. The dark-to-light transition is  
470 therefore considered an excellent system with which to understand assembly of the  
471 photosynthetic apparatus and as a consequence has long been used to study various  
472 aspects of the induction of photosynthesis in C<sub>3</sub> species<sup>29,50-54</sup>. Although there have also  
473 been a number of de-etiolation studies in C<sub>4</sub> species<sup>44,55-57</sup> our understanding of how genes  
474 encoding components of the C<sub>4</sub> cycle are integrated into the photosynthesis gene regulatory  
475 networks is limited<sup>8</sup>. Cotyledons of *G. gynandra* operate C<sub>4</sub> photosynthesis<sup>58</sup> and so  
476 seedlings undergoing de-etiolation represent a reasonable system with which to probe these  
477 processes. In the present study we focussed on changes associated with the induction of C<sub>3</sub>  
478 and C<sub>4</sub> photosynthesis and to investigate processes shared by C<sub>3</sub> Arabidopsis and C<sub>4</sub> *G.*  
479 *gynandra* we undertook a detailed analysis of de-etiolation.

480 Consistent with previous analysis of C<sub>3</sub> species<sup>50,59-62</sup> chloroplasts from *G. gynandra*  
481 followed a trajectory towards attaining full photosynthetic capacity over a 24-hour time  
482 course. In a recent systems biology study of tobacco, loss of the prolamellar body was  
483 detected after only 10 minutes of light, with granal stacking and chlorophyll accumulation  
484 then taking place<sup>29</sup>. Our observations are consistent with this, as prolamellar bodies in *G.*  
485 *gynandra* had started to disassemble 30 minutes after exposure to light. Furthermore,  
486 consistent with previous reports<sup>60,63</sup> chlorophyll content in *G. gynandra* increased linearly  
487 from 30 minutes to 12 hours after light exposure. Subsequent to this initial activity in building  
488 the photosynthetic apparatus, a period referred to as the building phase has been reported<sup>29</sup>.  
489 Consistent with previous reports<sup>29</sup>, in *G. gynandra* this building phase was detected from 12  
490 to 24 hours after light exposure and despite relatively little increase in chlorophyll content  
491 was associated with an increase in nuclear encoded photosynthesis transcripts.

492

### 493 **Co-ordinated gene expression patterns during de-etiolation of *G. gynandra***

494 The induction of photosynthesis transcripts in *G. gynandra* between 0 to 0.5 hours was  
495 associated with upregulation of previously identified master regulators of de-etiolation. For  
496 example, we were able to detect upregulation of genes encoding well characterised proteins  
497 involved in circadian rhythms and light regulation. This included two paralogs of the master  
498 regulator *ELONGATED HYPOCOTYL 5 (HY5)* as well as an ortholog of *EARLY*  
499 *PHYTOCHROME RESPONSIVE 1*. Clock components that also showed this early light

500 induction were two paralogs of *REVEILLE* (*RVE2*), as well as one each of *RVE1* and *LATE*  
501 *ELONGATED HYPOCOTYL* (*LHY*). Further, consistent with other species<sup>32</sup> the negative  
502 regulators of de-etiolation *PHYTOCHROME INTERACTING FACTOR7* (*PIF7*) and *PIF3-*  
503 *LIKE5 PIL5* from *G. gynandra* were rapidly down-regulated in light.

504 GO-terms associated with chloroplast development and photosynthesis were enriched at  
505 the 0.5 and 24 hours timepoints, a finding consistent with the two-phase response reported  
506 in cell lines of Arabidopsis<sup>30</sup> where significant changes in expression of plastid and  
507 chlorophyll biosynthesis genes occurred soon after light exposure. In *G. gynandra*, transcript  
508 levels of most photosynthesis genes showed an increased over the de-etiolation time  
509 course. This is consistent with the trend observed during de-etiolation of Arabidopsis<sup>43</sup>.  
510 Furthermore, transcript levels of most C<sub>4</sub> cycle genes in both Arabidopsis and *G. gynandra*  
511 increased steadily over the de-etiolation time course. A similar induction of C<sub>4</sub> cycle and  
512 photosynthesis genes has been reported in C<sub>3</sub> rice and C<sub>4</sub> maize<sup>44</sup>. The most parsimonious  
513 explanation for these findings is that in C<sub>3</sub> plants genes encoding components of the C<sub>4</sub>  
514 pathway show a basal induction in response to light, and that this ancestral system becomes  
515 amplified during the evolution of C<sub>4</sub> photosynthesis.

516

### 517 **Chromatin dynamics and transcription factor binding during de-etiolation of *G.*** 518 ***gynandra***

519 DHS density around the predicted transcription start sites increased for the first 2 hours of  
520 light suggesting a gain in chromatin accessibility around the proximal promoters of *G.*  
521 *gynandra*. This finding is consistent with loci becoming more accessible in light<sup>33</sup>. However,  
522 for early responding genes changes in accessibility in DHS's (dDHS) was not associated  
523 with increased gene expression (Supplementary Fig. 3) suggesting that broad-scale  
524 changes at DHS are not strongly predictive of gene expression patterns. This may be  
525 because transcription factor complexes that then bind have antagonistic actions on gene  
526 expression and demonstrates the need for an integrated systems biology approach to gain  
527 more detailed insight into the regulatory mechanisms. As open chromatin dynamics around  
528 these genes were not strongly predictive of gene expression, we analysed the cistromes  
529 located in accessible regions. This suggested that there was low convergence in the  
530 regulatory elements available for binding in C<sub>3</sub> and C<sub>4</sub> genes from *G. gynandra* despite  
531 similar dynamics of expression.

532 Consistent with previous work<sup>33</sup> our data indicate that changes in the distribution of  
533 transcription factor binding was associated both with changes in the location of open  
534 chromatin but also the binding of individual transcription factors. Notably, between 0 and 2  
535 hours of exposure to light, transcription factor binding events decreased in coding regions  
536 but increased in promoters and 5' UTRs. Transcription factor binding sites within codons are

537 referred to as duons as they determine both gene expression and the amino acid code.  
538 Duons have been proposed to act as repressors of gene expression in humans<sup>64</sup>. In plants,  
539 duons from the *NAD-ME1* and *NAD-ME2* genes placed downstream of the constitutive  
540 CaMV35S promoter restrict expression to bundle sheath cells of *G. gynandra*, consistent  
541 with them repressing gene expression in mesophyll cells<sup>12,13</sup>. In the current dataset, we  
542 found that transcription factor binding events predicted to be positive activators were 1.6 and  
543 2.9 times more likely to be found in promoters and introns respectively compared to  
544 predicted negative regulators. Predicted negative regulators were twice as likely to be found  
545 in exons as predicted positive regulators. Interestingly, the relationship between gene  
546 enhancement and binding to introns was even more striking than that of promoters. In  
547 *Drosophila melanogaster* enhancers have been reported to be enriched in promoter, 5'  
548 UTRs but especially introns and depleted in exons<sup>65</sup>. We propose that de-etiolation offers an  
549 attractive system with which to investigate the importance of how the location of transcription  
550 factor binding impacts on gene expression.

551

### 552 **Analysis of C<sub>3</sub> Arabidopsis reveals evolution has co-opted existing regulatory** 553 **mechanisms to pattern C<sub>4</sub> gene expression**

554 Compared with C<sub>3</sub> species, leaves from C<sub>4</sub> plants have increased expression of genes  
555 encoding the C<sub>4</sub> cycle, and decreased expression of those involved in photorespiration<sup>66-68</sup>.  
556 However, the dynamics with which these responses are established have not been fully  
557 defined. In the present study, photosynthesis as well as C<sub>4</sub> cycle genes showed light  
558 induction in both Arabidopsis and *G. gynandra*. Our datasets clearly demonstrate greater  
559 rates of transcript accumulation of core C<sub>4</sub> cycle genes in *G. gynandra* compared to  
560 orthologs from Arabidopsis during the de-etiolation time course (Fig. 5b). These findings are  
561 consistent with re-analysis of publicly available data for maize and rice<sup>44</sup> (Supplementary  
562 Fig. 6). We conclude that in at least two lineages that have independently evolved C<sub>4</sub>  
563 photosynthesis, genes associated with the C<sub>4</sub> cycle become part of gene regulatory  
564 networks that respond very strongly to the light-to-dark transition associated with de-  
565 etiolation.

566 The motifs of interest that were specifically over-represented in the *G. gynandra* C<sub>4</sub>  
567 cistrome included TGA bZIP and homeodomain motifs. These sequences therefore  
568 represent interesting candidates as regulators of C<sub>4</sub> specific processes. Homeodomain  
569 factors are documented to have a variety of roles, many related to development<sup>69</sup>.  
570 Homeodomain DGFs were detected in C<sub>4</sub> pathway components expressed in mesophyll  
571 cells including *BASS2*, *PPa6*, *PPDK*, *CA2/3*, *DIC1*, *NHD1* and *PPCK1*. Notably, *BASS2*,  
572 *PPa6* and *PPDK* contained DGF bound by HD-Zip IV factors with a mesophyll bias in both  
573 *G. gynandra* and Arabidopsis (Supplementary Fig. 7). Of this group of potential regulators,



574 an ortholog to *ANL2* showed the highest expression of all HD-Zip IV factors in the *G.*  
575 *gynandra* de-etiolation time-course with its highest levels at 0 hours. In Arabidopsis, *ANL2* is  
576 involved root development where it regulates the epidermal and cortical layers<sup>70</sup>. In leaves  
577 *ANL2* expression is strongest in mesophyll cells<sup>71</sup>. This gene therefore appears to be a  
578 strong candidate for regulating mesophyll specific expression in *C*<sub>4</sub> leaves.

579 The regulation of gene expression by light is mediated by *cis*-regulatory elements known  
580 as LREs<sup>21</sup>. Promoter regions of many photosynthesis associated nuclear genes, including  
581 chlorophyll *a/b* binding proteins and *RBCS* contain these *cis*-elements<sup>21,39,40,72</sup>. LREs  
582 incorporate various G-, GT-, E-, Z-, I- and GATA-box elements. We found that many of these  
583 LREs dominated the fifty most common motifs in accessible DNA around *C*<sub>4</sub> pathway genes  
584 of *G. gynandra*. Comparison of *C*<sub>3</sub> and *C*<sub>4</sub> genes in Arabidopsis and *G. gynandra* showed  
585 that many G- and E-box related motifs were enriched in both cistromes and so is consistent  
586 with the notion that these elements are important for the basal response to light during de-  
587 etiolation. Whilst there was some evidence for increased numbers of motifs associated with  
588 GT-boxes and GLK binding, these just missed a statistical cut off of  $p < 0.05$ . However,  
589 statistically robust increases in EEs, I-boxes and motifs bound by CGA1 and GNC were  
590 detected in *C*<sub>4</sub> genes from *G. gynandra* compared with Arabidopsis. As EEs are bound by  
591 the CCA1/LHY proteins that are core components of the circadian clock<sup>31</sup>, these data are  
592 consistent with evolution having made use of clock-regulation to enhance expression of *C*<sub>4</sub>  
593 genes in response to light. MYB-related I-box binding factors are not well characterised,  
594 although LeMYB1 from *Lycopersicon esculentum* (now *Solanum lycopersicum*) binds and  
595 activates the *RBCS3A* promoter<sup>73</sup>. The CGA1 and GNC transcription factors are known to  
596 regulate chloroplast biogenesis and photosynthesis-associated nuclear genes<sup>74</sup>, and so  
597 represent an alternate part of the photosynthesis gene regulatory network to which *C*<sub>4</sub> genes  
598 have become connected.

599 Overall, we provide evidence that evolution appears to have repeatedly co-opted  
600 regulatory elements operating in *C*<sub>3</sub> species to pattern *C*<sub>4</sub> gene expression in *C*<sub>4</sub> plants. This  
601 includes regulators in both *cis* and *trans*. For example, increased numbers of *cis*-elements  
602 that respond to light and regulate PhANGs in *C*<sub>3</sub> Arabidopsis were found in *C*<sub>4</sub> genes from *G.*  
603 *gynandra*. In the case of EEs and I-boxes regulated by MYB-related transcription factors  
604 these motifs were more frequently bound in *G. gynandra* than in Arabidopsis. Furthermore,  
605 the mesophyll specific expression of a number of *C*<sub>4</sub> genes was associated with a gain of  
606 *cis*-elements known to be bound by homeodomain transcription factors in *C*<sub>3</sub> Arabidopsis.  
607 These transcription factors that belong to the HD-Zip IV family were preferentially expressed  
608 in mesophyll cells of both Arabidopsis and *G. gynandra* suggesting mesophyll specific  
609 expression of *C*<sub>4</sub> pathway genes is generated because they become integrated into an  
610 existing cell specific network that operates in the ancestral *C*<sub>3</sub> state. More broadly, the

611 findings indicate that C<sub>3</sub> models such as Arabidopsis can provide significant insight into gene  
612 regulatory networks that operate in C<sub>4</sub> plants.



## 613 MATERIALS AND METHODS

### 614 Plant growth, chlorophyll quantitation and microscopy

615 *Gynandropsis gynandra* seeds were sown directly from intact pods and germinated on  
616 moist filter papers in the dark at 32 °C for 24 hours. Germinated seeds were then transferred  
617 to half strength Murashige and Skoog (MS) medium with 0.8 % (w/v) agar (pH 5.8) and  
618 grown for three days in a growth chamber at 26 °C. De-etiolation was induced by exposure  
619 to white light with a photon flux density (PFD) of 350  $\mu\text{mol m}^{-2} \text{s}^{-1}$  and photoperiod of 16  
620 hours. Whole seedlings were harvested at 0.5, 2, 4 and 24 hours after illumination (starting  
621 at 8:00 with light cycle 6:00 to 22:00). Tissue was flash frozen in liquid nitrogen and stored at  
622 -80 °C prior to processing.

623 For analysis of chlorophyll content, de-etiolating *G. gynandra* seedlings were flash frozen  
624 at 0, 0.5, 2, 4 or 24 hours post light exposure. 100 mg of tissue was suspended in 1 ml 80 %  
625 (v/v) acetone at 4 °C for 10 minutes prior to centrifugation at 15,700 g for 5 minutes and  
626 removal of the supernatant. The pellet was resuspended in 1 ml 80 % (v/v) acetone at 4 °C  
627 for 10 minutes, precipitated at 15,700 g for 5 minutes. Supernatants were pooled, and  
628 absorbance measured in a spectrophotometer at 663.8 nm and 646.6 nm. Total chlorophyll  
629 content determined as described previously<sup>75</sup>.

630 For electron microscopy, *G. gynandra* cotyledons (~2 mm<sup>2</sup>) were excised with a razor  
631 blade and fixed immediately in 2 % (v/v) glutaraldehyde and 2 % (w/v) formaldehyde in 0.05-  
632 0.1M sodium cacodylate (NaCac) buffer (pH 7.4) containing 2 mM calcium chloride. Samples  
633 were vacuum infiltrated overnight, washed five times in deionized water, and post-fixed in 1  
634 % (v/v) aqueous osmium tetroxide, 1.5 % (w/v) potassium ferricyanide in  
635 0.05 M NaCac buffer for 3 days at 4 °C. After osmication, samples were washed five times in  
636 deionized water and post-fixed in 0.1 % (w/v) thiocarbohydrazide in 0.05 M NaCac buffer for  
637 20 minutes at room temperature in the dark. Samples were then washed five times in  
638 deionized water and osmicated for a second time for 1 hour in 2 % (v/v) aqueous osmium  
639 tetroxide in 0.05 M NaCac buffer at room temperature. Samples were washed five times in  
640 deionized water and subsequently stained in 2 % (w/v) uranyl acetate in 0.05 M maleate  
641 buffer (pH 5.5) for 3 days at 4 °C and washed five times afterwards in deionized water. Next,  
642 samples were dehydrated in an ethanol series, transferred to acetone, and then to  
643 acetonitrile. Samples were embedded in Quetol 651 resin mix (TAAB  
644 Laboratories Equipment Ltd). For transmission electron microscopy (TEM), ultra-thin  
645 sections were cut with a diamond knife, collected on copper grids and examined in a  
646 FEI Tecnai G2 transmission electron microscope (200 keV, 20  $\mu\text{m}$  objective aperture).  
647 Images were obtained with AMT CCD camera. For scanning electron microscopy (SEM),  
648 ultrathin-sections were placed on plastic coverslips which were mounted on aluminium SEM  
649 stubs, sputter-coated with a thin layer of iridium and imaged in a FEI Verios 460 scanning

650 electron microscope. For light microscopy, thin sections were stained with methylene blue  
651 and imaged by an Olympus BX41 light microscope with a mounted Micropublisher 3.3 RTV  
652 camera (Q Imaging).

653

#### 654 **RNA and DNaseI sequencing**

655 Before processing, frozen samples were divided into two, the first being used for RNA-  
656 SEQ analysis and the second for DNaseI-SEQ. Samples were ground in a mortar and pestle  
657 and RNA extraction carried out with the RNeasy Plant Mini Kit (74904; QIAGEN) according  
658 to the manufacturer's instructions. RNA quality and integrity were assessed on a Bioanalyzer  
659 High Sensitivity DNA Chip (Agilent Technologies). Library preparation was performed with  
660 500 ng of high integrity total RNA (RNA integrity number > 8) using the QuantSeq 3' mRNA-  
661 SEQ Library Preparation Kit FWD for Illumina (Lexogen) following the manufacturer's  
662 instructions. Library quantity and quality were checked using Qubit (Life Technologies) and a  
663 Bioanalyzer High Sensitivity DNA Chip (Agilent Technologies). Libraries were sequenced  
664 on NextSeq 500 (Illumina, Chesterford, UK) using single-end sequencing and a Mid Output  
665 150 cycle run.

666 To extract nuclei, tissue was ground in liquid nitrogen and incubated for five minutes in  
667 15mM PIPES pH 6.5, 0.3 M sucrose, 1 % (v/v) Triton X-100, 20mM NaCl, 80 mM KCl, 0.1  
668 mM EDTA, 0.25 mM spermidine, 0.25 g Polyvinylpyrrolidone (SIGMA), EDTA-free  
669 proteinase inhibitors (ROCHE), filtered through two layers of Miracloth (Millipore) and  
670 pelleted by centrifugation at 4 °C for 15 min at 3600 g. To isolate deproteinated DNA, 100  
671 mg of tissue from seedlings exposed to 24 hours light were harvested two hours into the light  
672 cycle, four days after germination. DNA was extracted using a QIAGEN DNeasy Plant Mini  
673 Kit (QIAGEN, UK) according to the manufacturer's instructions.  $2 \times 10^8$  nuclei were re-  
674 suspended at 4 °C in digestion buffer (15 mM Tris-HCl, 90 mM NaCl, 60 mM KCl, 6 mM  
675  $\text{CaCl}_2$ , 0.5 mM spermidine, 1 mM EDTA and 0.5 mM EGTA, pH 8.0). DNase-I (Fermentas)  
676 at 2.5 U was added to each tube and incubated at 37 °C for three minutes. Digestion was  
677 arrested by adding a 1:1 volume of stop buffer (50 mM Tris-HCl, 100 mM NaCl, 0.1 % (w/v)  
678 SDS, 100 mM EDTA, pH 8.0, 1 mM Spermidine, 0.3 mM Spermine, RNaseA40  $\mu\text{g/ml}$ ) and  
679 incubated at 55 °C for 15 minutes. 50 U of Proteinase K were then added and samples  
680 incubated at 55 °C for 1 h. DNA was isolated by mixing with 1 ml  
681 25:24:1 Phenol:Chloroform:Isoamyl Alcohol (Ambion) and spun for 5 minutes at 15,700 g  
682 followed by ethanol precipitation of the aqueous phase. Samples were size-selected (50-400  
683 bp) using agarose gel electrophoresis and quantified fluorometrically using a Qubit 3.0  
684 Fluorometer (Life technologies), and a total of 10 ng of digested DNA ( $200 \text{ pg l}^{-1}$ ) used for  
685 library construction. Sequencing ready libraries were prepared using a TruSeq Nano DNA  
686 library kit according to the manufacturer's instructions. Quality of libraries was determined

687 using a Bioanalyzer High Sensitivity DNA Chip (Agilent Technologies) and quantified by  
688 Qubit (Life Technologies) and qPCR using an NGS Library Quantification Kit (KAPA  
689 Biosystems) prior to normalisation, and then pooled, diluted and denatured for paired-end  
690 sequencing using High Output 150 cycle run (2x 75 bp reads). Sequencing was performed  
691 using NextSeq 500 (Illumina, Chesterford UK) with 2x 75 cycles of sequencing.

692

### 693 **RNA-SEQ data processing and quantification**

694 Commands used are available on GitHub however an outline of steps was as follows.  
695 Raw single ended reads were trimmed using trimmomatic<sup>76</sup> (version 0.36). Trimmed reads  
696 were then quantified using salmon<sup>77</sup> (version 0.4.234) after building an index file for a  
697 modified *G. gynandra* transcriptome. The transcriptome was modified to create a pseudo 3'  
698 UTR sequence of 339 bp (the mean length of identified 3'UTRs) for *G. gynandra* gene  
699 models that lacked a 3' UTR sequence which was essentially an extension beyond the stop  
700 codon of the gDNA. Inclusion of this psuedo 3' UTR improved mapping rates. Each sample  
701 was then quantified using the salmon "quant" tool. All \*.sf files had the "NumReads" columns  
702 merged into a single file (All\_read\_counts.txt) to allow analysis with both DEseq2<sup>78</sup>  
703 and edgeR<sup>79</sup>. The edgeR pipeline was run as the edgeR.R R script (on GitHub) on  
704 the All\_read\_counts.txt file to identify the significantly differentially expressed genes by  
705 comparing each time-point to the previous. A low expression filter step was also used. We  
706 then similarly analysed the data with the DEseq2 package using the DEseq2.R R script (on  
707 GitHub) on the same All\_read\_counts.txt file. This also included the PCA analysis. The  
708 intersection from both methods was used to identify a robust set of differentially regulated  
709 genes. For most further analysis of the RNA-SEQ data, mean TPM values for each time-  
710 points (from three biological replicates) was first quantile normalised and then each value  
711 divided by the mean such that values greater than 1 were higher than average. This  
712 processing facilitates comparisons between experiments across species in identifying  
713 changes to transcript abundance between orthologs.

714

### 715 **GO enrichment analysis, identification of C<sub>3</sub> and C<sub>4</sub> gene lists and heatmap plotting**

716 The agrigo-v2 web tool was used for GO analysis following the tools instructions for a  
717 custom background. The background was made by mapping all *G. gynandra* genes to their  
718 closest Arabidopsis blastp hit and inheriting all the GO terms associated with that gene from  
719 the TAIR gene annotation file (Athaliana\_167\_TAIR10.annotation\_info.txt from Phytozome).  
720 Differentially expressed genes from each time-point were analysed and GO terms with  
721 significance  $< 10^{-5}$  in at least one DE gene set were kept (Supplementary Table 1,  
722 Supplementary Fig. 2). Representative GO terms were selected for plotting in a stacked  
723 barplot using the R script (Fig2B.R) and data file Fig2B\_GO\_term\_data.txt (on GitHub).

724 In order to map orthologs between Arabidopsis and *G. gynandra*, OrthoFinder<sup>80</sup> was  
725 used. This allows more complex relationships than a 1:1 to be identified and placed into  
726 orthogroups. C<sub>3</sub> photosynthesis genes were first identified from Arabidopsis through the  
727 “photosynthesis” (GO:0015979) keyword search on the TAIR browse tool  
728 (<https://www.arabidopsis.org/servlets/TairObject?type=keyword&id=6756>) and gave ninety-  
729 two genes for Arabidopsis. Their orthologs were found in *G. gynandra* using the orthogroups  
730 generated between the two species and resulted in ninety-three C<sub>3</sub> photosynthesis genes.  
731 C<sub>4</sub> genes used in this study are considered the “core” pathway genes and are a manually  
732 curated set largely based on previous analysis<sup>23</sup>. Initially, multiple paralogs were included  
733 but non-induced transcripts were then filtered out. Orthologs between the two species were  
734 again identified from the orthogroups from OrthoFinder. The *G. gynandra* C<sub>3</sub> and C<sub>4</sub> gene  
735 normalised expression values were further processed with each value being divided by the  
736 row mean and log<sub>10</sub> (log(x/row mean)) plotted as a heatmap using the R script Fig2C.R on  
737 data file Fig2C\_heatmap\_data.txt (on GitHub). The heatmap for Arabidopsis C<sub>3</sub> and C<sub>4</sub> gene  
738 expression was made in the same way as for the *G. gynandra* data using the gene lists as  
739 previously described.

740

#### 741 **Identification of four expression behaviours of *G. gynandra* transcription factors**

742 In order to identify transcription factors of interest during *G. Gynandra* de-etiolation we  
743 first found all potential transcription factors using homology (blastp) to the Arabidopsis  
744 transcription factor protein sequences found in the Plant Transcription Factor Database  
745 ([http://plntfdb.bio.uni-potsdam.de/v3.0/downloads.php?sp\\_id=ATH](http://plntfdb.bio.uni-potsdam.de/v3.0/downloads.php?sp_id=ATH)). 2,481 potential *G.*  
746 *gynandra* transcription factors were then filtered to remove those with low expression and  
747 classified into four expression patterns of interest: i) Strongly and positively correlated with  
748 induced C<sub>3</sub> genes (>0.7 Pearson Correlation; n=21); ii) Strong and specific up-regulation at  
749 0.5 hours (n=26); iii) Strongly and negatively correlated with induced C<sub>3</sub> genes <-0.7  
750 Pearson Correlation; n=62); iv) Strong and specific down-regulation at 0.5 hours (n=22).  
751 These sets were plotted from using the Fig2D.R R script on the Fig2D\_data.txt file (on  
752 GitHub).

753

#### 754 **DNaseI-SEQ data processing**

755 The three biological replicates for each time-point were sequenced in multiple runs with  
756 one sample being chosen, based on initial QC scores, for deeper sequencing to provide the  
757 necessary depth for calling both DNaseI Hypersensitive Site (DHS) and Digital Genomic  
758 Footprints (DGF). For each sample, the raw reads from multiple sequencing runs were  
759 combined and trimmed for low quality reads using trimmomatic. These files were analysed  
760 with fastqc (<http://www.bioinformatics.babraham.ac.uk/projects/fastqc/>) to ensure samples

761 passed important QC parameters (see Fig3\_MultiQC\_summary.html on GitHub) and then  
762 mapped to the *G. gynandra* genome using bowtie2 (version 2.3.4.1) with the “--local” pre-set  
763 option. Following mapping, a bash script (Fig3\_DNaseSEQ\_tagAlign.sh on GitHub) was run  
764 on each bam file which in summary: filters low quality (MAPQ < 30) mapped reads and plots  
765 MAPQ distribution, removes duplicates, measures library complexity, fragment sizes, GC  
766 bias and finally makes tagAlign files. The three tagAlign files from each time-point were then  
767 merged before running another bash script (DHS\_DGF\_identification.sh on GitHub) for each  
768 time-point which in summary: uses “macs2 callpeak” to identify “narrowPeaks”, finds the  
769 distance for each DHS to its closest transcriptional start site (TSS), calculates SPOT scores  
770 (see <https://www.encodeproject.org/data-standards/dnase-SEQ/>), plots DHS profiles using  
771 the deeptools bamCoverage, computeMatrix and plotProfile tools and finally calls DGF using  
772 the wellington\_footprints.py program<sup>81</sup>. The footprints identified with a log(*p*-value) cut-off of  
773 < -10 were used for further analysis. DHS positions relative to TSS for each sample were  
774 plotted using an R script (Fig3B.R) on the file Fig3B\_DHS\_TSS\_data.txt (on GitHub).

775

#### 776 **Analysis of DHS changes across the time-course**

777 To quantify the overlap in DHS between samples, DHS (from the “narrowPeak” file) were  
778 sorted by their “-log10qvalue” column and only the top ranked DHS regions used until a total  
779 of 55,122,108 bp was reached which corresponded to the total length of DHS regions in the  
780 4 hours sample which had the least. This allowed us to compare overlap between equal  
781 sized regions. These DHS regions for each time-point were then intersected in a pairwise  
782 fashion using bedtools intersect. The total length of intersecting regions was divided by  
783 55,122,108 bp to obtain the proportion of overlap for each pairwise comparison generating  
784 the values in Fig. 3c. To compare the differential DHS (dDHS) scores for gene sets of  
785 interest, we defined promoter regions around each gene of interest as 1000 bp upstream  
786 from TSS.

787 We then identified DHS regions that intersected with each gene of interest (i.e., all DHS  
788 regions overlapping with a gene body or promoter) and merged these DHS regions  
789 (equivalent to an outer join). The dDHS tool<sup>34</sup> as part of the pyDNase package<sup>82</sup> to quantify  
790 changes in accessibility between consecutive time-points for a given region, where  
791 SAMPLEA precedes SAMPLEB in the time-course. Finally, these dDHS values were plotted  
792 in violin plots using the R script Fig3D.R on the data sets Fig3D\_dDHS\_data.txt (on GitHub).

793

#### 794 **Motif Analysis of DHS regions**

795 All DHS intersecting with genes of interest were scanned for the presence of motifs from  
796 the DAPseq<sup>35</sup> and PBM<sup>36</sup> databases using the meme suite FIMO tool<sup>37</sup>. To identify shared  
797 behaviours while minimising noise, lists of both C<sub>3</sub> and C<sub>4</sub> pathway genes were filtered to



798 keep only those that showed induction across the time course. As before, we found all DHS  
799 regions intersecting with genes of interest, including promoter, extracted the fasta  
800 sequences of these regions and scanned them for the motifs.

801 The same process was carried out on three sets of 500 random genes to generate a  
802 background frequency for random DHS region. Each motif frequency for a gene set (e.g.,  
803 C<sub>4</sub> pathway gene DHS motif frequencies) was first normalised by the total number of motifs  
804 found in that set and then normalised again against the background value for that motif such  
805 that values greater than 0 indicated a higher than background rate and *vice versa* for values  
806 below 0. This approach allowed us to identify enrichments in high confidence, high affinity  
807 motif matches. While FIMO identifies higher confidence hits over a threshold, we also used  
808 the AME program<sup>38</sup> to identify statistically enriched motifs within the C<sub>4</sub> cistrome as  
809 compared to the C<sub>3</sub> cistrome using the webserver (<http://meme-suite.org/tools/ame>) and the  
810 DAP-SEQ motif database with default settings. We also used AME to identify DAP-SEQ  
811 motifs enriched in both the cistromes as compared to randomised sequence controls.

812

### 813 **DNaseI bias correction**

814 To reduce the proportion of false positive DGF calls caused by DNaseI cutting bias,  
815 DNaseI-SEQ was performed on de-proteinated gDNA and mapped to the *G.*  
816 *gynandra* genome. The hexamer cutting frequencies at the DNaseI cutting sites were used  
817 to generate a background signal profile that was incorporated into a mixture model to  
818 calculate the log-likelihood ratio (FLR) for each footprint using the R package MixtureModel<sup>42</sup>.  
819 DGF with low confidence (FLR<0) were filtered out resulting in a reduction of 11.6 to 37.5 %  
820 of DGF per timepoint. Same pipeline was used in previous analysis<sup>83</sup>. The pipeline is  
821 illustrated in Supplementary Fig. 3.

822

### 823 **DGF genomic feature distributions DGF motif frequencies and DGF-target correlation**

824 To identify the distribution of DGF across genomic features we used bedtools intersect to  
825 find the frequency of intersection between the DGF with features in the genome annotation  
826 gff3 file promoter (2000 bp upstream of TSS), 5' UTR, CDS, intron, 3' UTR and intergenic).  
827 These frequencies were divided by the total length of each feature across the genome to  
828 determine a density of DGF per feature and these values were plotted as a pie chart for  
829 each time point.

830 In order to link DGF to possible functions, we scanned all DGF using the meme suite fimo  
831 tool for both DAPseq and PMB motifs as described above. To visualise how motif  
832 frequencies changed during de-etiolation, the frequency of each motif at each time-point was  
833 first normalised by the total number of motifs at that time point and then each value was  
834 mean centred across the time-course for plotting as a heatmap using the Fig4C.R R script

835 on the Fig4C\_heatmap\_data.txt file (on GitHub). This hierarchical clustering was then  
836 manually grouped and word clouds generated for the motif transcription factor families using  
837 an online tool (<https://www.wordclouds.com/>) for each motif cluster.

838 Once individual DGF were annotated with potential motifs, we correlated the changes in  
839 frequency of each motif with the mean expression of all the potential targets. The changes in  
840 frequency of each motif were used as a proxy of their factor's abundance and/or activity and  
841 potential targets are identified as those genes lying closest to a DGF with a specific motif. A  
842 strong positive correlation was used to suggest positive regulation while a strong negative  
843 correlation suggests inhibitory regulation.

844

### 845 **Arabidopsis RNA-SEQ and DNaseI-SEQ**

846 In order to carry out comparative analysis between *G. gynandra* and Arabidopsis, an  
847 analogous de-etiolation time-course<sup>43</sup> was reprocessed in the same way as the *G.*  
848 *gynandra* data. Arabidopsis DNaseI-SEQ data was mapped to the TAIR9 genome and RNA-  
849 SEQ was mapped using Salmon to the Araport11 transcriptome, followed by the use of  
850 tximport to collapse expression values for all isomers into a single value, a step not required  
851 for *G. gynandra* as it lacks isomer information. To allow inter-species comparisons, as with  
852 *G. gynandra* the Arabidopsis RNA-SEQ data was quantile normalised and then each value  
853 divided by the samples mean expression value. Normalised expression values for the core  
854 set of C<sub>4</sub> pathway genes from *G. gynandra* were compared with orthologs from Arabidopsis,  
855 and when there was more than one paralog identified, the most highly expressed was  
856 selected. Line plots were generated using the Fig5B.R R script on the  
857 Fig5B\_C4\_pathway\_data.txt file (on GitHub). To analyse and compare motifs between  
858 species, we ranked motifs by their normalised frequencies against the background for each  
859 gene sets DHS (C<sub>4</sub> pathway and C<sub>3</sub> photosynthesis from both *G. gynandra* and *A. thaliana*).  
860 These sets were filtered to remove genes that were not induced during the time-course. The  
861 top 50 motifs from each set were then plotted against their rank in other sets. As motifs that  
862 were highly ranked in *G. gynandra* C<sub>4</sub> genes were of particular interest, these were plotted  
863 as a heatmap using the Fig5G.R R script on the Fig5G\_motif\_rank\_data.txt file (on GitHub).

864 To create cumulative line plots a number of steps were required. First, as individual motif  
865 frequencies are low for any given small set of genes (e.g. 105174 DGF found in the 24 hour  
866 time-point giving ~3 per gene loci) we grouped motifs based on motif clustering using the  
867 RSAT motif matrix clustering tool with default settings ([http://rsat.sb-roscoff.fr/matrix-clustering\\_form.cgi](http://rsat.sb-roscoff.fr/matrix-clustering_form.cgi)). This meant all members from the same cluster were treated as one  
868 motif group (for example, all TCP motifs are found in group 10). For motif groups see the file  
869 DAPseq\_PBM\_Motif\_Matrix\_Clustering.txt (on GitHub). These values were then normalised  
870 for each time-point by dividing by the total number of motifs such that the values represented  
871

872 a proportion of the total. These values were then plotted in a cumulative line plot using the  
873 Fig5H.R R script on the Fig5H\_data.txt (on GitHub).

874 The quantification of light and chloroplastic regulatory elements was carried out on the  
875 gDNA sequence of the 10 strongly induced *G. gynandra* core C<sub>4</sub> pathway gene loci,  
876 including a 1500 bp promoter region, and their most highly expressed Arabidopsis ortholog  
877 loci. In summary, matches to the highly conserved core sequences of each element were  
878 counted and compared between the two species gene sets (see GitHub for command  
879 example). A one-tailed t-test was used to show no significant increase in the frequencies of  
880 these elements in the *G. gynandra* genes as compared to the Arabidopsis orthologs.

881

## 882 **Phylogeny and cell specific expression of homeodomain factors in Arabidopsis and** 883 ***G. gynandra***

884 Homeodomain factors were identified from Arabidopsis transcription factor databases and  
885 all potential transcription factors in *G. gynandra* were identified by sequence similarity.  
886 Phylogenetic trees of the protein sequences from both species were made using the ete3 tool.  
887 The tree was loaded into the iTOL web tool where the log(BS/M or Whole Leaf) ratio of each  
888 gene was added to the tree. This expression data was obtained from publicly available  
889 datasets<sup>47,48</sup>.

890

## 891 **Re-processing of *O. sativa* and *Z. mays* de-etiolation time-course RNA-SEQ**

892 Data from the monocot de-etiolation study<sup>44</sup> was downloaded from the Short Read  
893 Archive (SRX766219). Reads for both species were quantified using Salmon quant with the  
894 *Z. mays* reads being mapped to Zm-B73-REFERENCE-NAM-5.0\_Zm00001e.1.cdna.fa file  
895 available from MaizeDB while *O. sativa* reads were mapped to  
896 Osativa\_323\_v7.0.cds\_primaryTranscriptOnly.fa available from Phytozome. TPM values  
897 were quantile normalised and then each value divided by the sample mean. *O. sativa* C<sub>4</sub>  
898 orthologs were identified using orthofinder to identify orthogroups with the Arabidopsis C<sub>4</sub>  
899 orthologs used in this study. *Z. mays* C<sub>4</sub> genes were identified by blasting to these same  
900 Arabidopsis genes. Line plots were then made grouping all putative orthologs.

901

## 902 **ACCESSION NUMBERS**

903 Raw sequencing data files are deposited in The National Center for Biotechnology  
904 Information (PRJNA640984). For full methods, commands, and scripts, see GitHub  
905 (<https://github.com/hibberd-lab/Singh-Stevenson-Gynandra>).

906

## 907 **ACKNOWLEDGMENTS**



908 We thank the Cambridge Advanced Imaging Centre, University of Cambridge for resin  
909 embedding the electron microscopy samples and providing the access to electron  
910 microscopes. The work was supported by BBSRC Grant BBP0031171 and European  
911 Research Council Grant 694733 Revolution to J.M.H.

912

### 913 **AUTHOR CONTRIBUTIONS**

914 PS, SRS and JMH designed the study. PS carried out the experimental work. SRS and PS  
915 analysed the data. IRL performed de-proteinated DNaseI data analysis. GR assisted in  
916 DNaseI assays and library preparations. TBS and PS carried out electron microscopy. PS,  
917 SRS and JMH wrote the article and prepared the figures.

918 **FIGURE LEGENDS**

919 **Fig. 1: Establishment of photosynthesis in *G. gynandra*.** (a) Representative images of  
920 *Gynandropsis gynandra* seedlings illustrating greening and unhooking of the cotyledons. (b)  
921 Total chlorophyll over the time-course (data shown as means from three biological replicates  
922 at each time point,  $\pm$  one standard deviation from the mean). The first four hours show an  
923 exponential increase (inset). Bar along the x-axis indicates periods of light (0-14 hours), dark  
924 (14-22 hours) and light (22-24 hours). (c-d) Representative transmission electron  
925 microscope images of Mesophyll (c) and Bundle Sheath (d) chloroplasts of de-etiolating *G.*  
926 *gynandra* seedlings at 0, 0.5, 2, 4 and 24 hours after exposure to light. Asterisks and  
927 arrowheads indicate the prolamellar body and photosynthetic membranes respectively.  
928 Samples at each time were taken for RNA-SEQ and DNaseI-SEQ. Scale bars represent 0.5  
929 mm for seedlings and 50  $\mu$ m for cotyledons (a), and 500 nm (c-d).

930

931 **Fig. 2: Changes in transcript abundance during greening of *G. gynandra*.** (a) Principal  
932 component analysis of RNA-SEQ datasets. The three biological replicates from each  
933 timepoint of de-etiolating *G. gynandra* seedlings (0, 0.5, 2, 4 and 24 hours) form distinct  
934 clusters. (b) Enriched GO terms between consecutive timepoints for up- and down-regulated  
935 genes. (c) Heatmap illustrating changes in transcript abundance of photosynthesis (grey  
936 sidebar) and  $C_4$  photosynthesis genes (black sidebar) during the time-course. Data are  
937 shown after normalisation of expression data with each gene plotted on a row and centred  
938 around the row mean. Colour-coding of the dendrograms (red, yellow and green) highlight  
939 expression clusters representing none, moderate and strong induction respectively. (d) Line  
940 graphs depicting dynamics of transcription factors positively or negatively correlated with  
941 induced photosynthesis genes, or that showed early (0.5 hours) up- or down- regulation  
942 during the de-etiolation time-course. Values shown are normalised and centred around the  
943 mean of each gene.

944

945 **Fig. 3: Profiling of open chromatin during de-etiolating of *G. gynandra*.** (a) Schematic  
946 illustrating DNaseI-SEQ and the total number of DNaseI-hypersensitive sites (DHSs)  
947 detected. (b) Density of open chromatin plotted relative to the nearest Transcription Start  
948 Site (TSS). Inset highlights maximum density overlapping with the TSS at each time point.  
949 (c) Percentage of DHSs non-overlapping at each timepoint. (d) Violin plots depicting  
950 changes in DHS accessibility (dDHS) associated with photosynthesis genes,  $C_4$   
951 photosynthesis genes, and transcription factors that were positively or negatively correlated  
952 with photosynthesis genes. Changes are relative to the previous timepoint, n values are for  
953 the number of DHS regions quantified. (e) Scatter plot of FIMO motif frequencies in  $C_3$  and

954 C<sub>4</sub> photosynthesis gene from (log<sub>10</sub> normalised motif frequency/normalised background  
955 frequency). Motifs annotated in orange and the associated Wordcloud highlight those  
956 enriched in the C<sub>4</sub> cistrome compared with the C<sub>3</sub> cistrome, and those in red indicate bZIP  
957 motifs enriched in both the C<sub>3</sub> and C<sub>4</sub> cistromes from both FIMO and AME analysis.

958

959 **Fig. 4: Transcription factor binding atlas for de-etiolating seedlings *G. gynandra*.** (a)  
960 Schematic illustrating sampling, number of Digital Genomic Footprints (DGF) identified and  
961 representative density plot of DGF positions relative to the nearest transcription start site  
962 (TSS). (b) Pie-charts summarising the density of DGF among genomic features. Promoters  
963 are defined as sequence < 2000 base pairs upstream of TSSs while intergenic represent  
964 any regions not overlapping with other features. Values indicate densities of DGFs in each  
965 feature as proportions. (c) Bar chart showing the percentage of DGFs predicted to function  
966 either as activators (coral bars) or repressors (turquoise bars) lying within gene features of  
967 target genes. Statistically significant differences were found for the promoters, CDS and  
968 intronic regions using a Chi square goodness of fit test ("\*\*"). (d) Heatmap of motif  
969 frequencies (log<sub>10</sub> sample normalised motif frequency/row mean) during de-etiolation. To  
970 illustrate identity and heterogeneity of motif groups clusters were annotated with  
971 Wordclouds.

972

973 **Fig. 5: Comparison of transcript abundance for photosynthetic genes during de-**  
974 **etiolation of C<sub>3</sub> *Arabidopsis thaliana* and C<sub>4</sub> *G. gynandra*.** (a) Schematic illustrating RNA-  
975 SEQ of *Arabidopsis*. (b) Expression patterns of photosynthesis genes (grey sidebar) and C<sub>4</sub>  
976 orthologs (black sidebar) during de-etiolation. Heatmap illustrating gene expression with  
977 each gene being represented by a row, and data centred around the row mean.  
978 Dendrograms (red, yellow and green) highlight distinct expression clusters representing no  
979 clear, moderate, or strong induction. (c) Line graphs depicting quantile normalised and mean  
980 divided expression patterns of twelve C<sub>4</sub> orthologs in C<sub>3</sub> *Arabidopsis* and C<sub>4</sub> *G. gynandra*.  
981 Where there is more than a 1:1 relationship between genes, the most abundant paralog from  
982 each orthogroup is presented.

983

984 **Fig. 6: Comparative analysis of potential regulatory mechanisms for de-etiolating**  
985 **seedlings of C<sub>3</sub> *Arabidopsis thaliana* and C<sub>4</sub> *G. gynandra*.** Scatter plots showing the most  
986 enriched motifs in each cistrome (where 1 represents the most enriched motif). (a) Top 50  
987 motifs in photosynthesis genes of C<sub>3</sub> *Arabidopsis* (At) and C<sub>4</sub> *G. gynandra* (Gg), (b) C<sub>4</sub> and  
988 photosynthesis genes of C<sub>3</sub> *Arabidopsis*, and (c) C<sub>4</sub> genes from C<sub>3</sub> *Arabidopsis* and *C.*  
989 *gynandra*. Motifs from the cistromes of C<sub>3</sub> and C<sub>4</sub> genes that showed induction during de-  
990 etiolation. (d) Heatmap of the top 50 motifs from DHSs of C<sub>4</sub> genes in *G. gynandra*

991 compared with their ranking in C<sub>4</sub> genes of Arabidopsis and photosynthesis genes in both  
992 species (log<sub>2</sub> of the motif ranks across all four cistrome sets). Two distinct groups are  
993 highlighted with green motifs being highly ranked (more enriched) in all four cistromes while  
994 the red motifs are those specifically highly ranked in the *G. gynandra* C<sub>4</sub> cistrome. Motifs  
995 characterised as light-regulatory elements (LREs) are labelled with symbols used in (e). (e)  
996 Sequence logos highlighting different classes of Light Responsive Elements (LREs) and  
997 regulators of photosynthesis-associated nuclear genes (PhANGs). Seqlogos were generated  
998 from DAP-SEQ and PBM consensus motifs for all members of each type. (f) Analysis of  
999 which LREs and regulators of PhANGs are statistically enriched in cistromes of C<sub>4</sub> genes  
1000 from *G. gynandra* and Arabidopsis. AME generates likelihood score for over-representation  
1001 ( $-1 \cdot \log(\text{adjusted p-value})$ , y-axis), and the adjusted  $p < 0.05$  is illustrated with a dashed line.  
1002 (g) Transcription factor binding sites associated with EE and I-box binding as well as the  
1003 homeodomain and LOB/AS2 families dis-proportionally found in C<sub>4</sub> genes from *G. gynandra*  
1004 compared with orthologs from Arabidopsis, and photosynthesis genes in both species.  
1005 Values plotted are the motif proportion of the total number of DGF at each sample over the  
1006 time-course such that differences between and within experiments were normalised. (h)  
1007 Model illustrating association between enhanced C<sub>4</sub> cycle gene expression in *G. gynandra*  
1008 compared with Arabidopsis and gain of *cis*-elements bound by MYB-related and C2C2-  
1009 GATA transcription factors as well as the gain of homeodomain binding sites in mesophyll  
1010 expressed genes in C<sub>4</sub> *G. gynandra*.

1011

## 1012 **SUPPLEMENTARY FIGURE LEGENDS**

1013 **Supplementary Fig. 1:** Representative light and scanning electron microscope (SEM)  
1014 images of 0 hours (A) and 24 hours (B) de-etiolating *G. gynandra* seedlings at 0 and 24  
1015 hours after exposure to light. Scale bars represent 100  $\mu\text{m}$  for light microscope images, and  
1016 500 nm for SEM.

1017

1018 **Supplementary Fig. 2:** GO term enrichment analysis for differentially expressed genes as  
1019 compared to the previous time point. Significantly enriched GO terms were identified using  
1020 AgriGov2 using a custom *G. gynandra* background built by mapping *G. gynandra* proteins to  
1021 their closest match in Arabidopsis and inheriting their terms from the TAIR10 annotations.  
1022 Values plotted are  $-\log_{10}(\text{FDR})$  and values derived from the up-regulated gene sets are  
1023 shown in red while those from the down-regulated are shown in blue. Many light and  
1024 photosynthesis-related terms are enriched in the 0.5 hours up-regulated genes. Many  
1025 primary and secondary metabolism terms are enriched in the 24 hours up-regulated genes  
1026 suggesting that photosynthates are being produced by the end of the time course.

1027

1028 **Supplementary Fig. 3:** Pipeline for DNaseI-SEQ data processing. On the top left-hand side,  
1029 pooled reads went through quality control before DHS identification using  
1030 MACS2 peakcalling. The DHSs, representing accessible chromatin regions, are then  
1031 searched for DGF using the pyDNase package. These DGF are prone to distorting effects  
1032 due to DNaseI bias in gDNA digestion. On the top right, the pipeline for identifying this bias  
1033 is shown which includes the DNaseI digestion of deproteinised (“naked”) gDNA. This  
1034 generates 6-mer frequencies at each cut site which is used as input for  
1035 the FootPrintMixture.R tool which scores the Footprint Likelihood Ratio (FLR) of each DGF  
1036 (likelihood of being a true positive). DGF with  $FLR < 0$  were removed leaving a final set of  
1037 DGF which were used for analysis. Heatmap of cut patterns are shown centred around each  
1038 DGF.

1039

1040 **Supplementary Fig. 4:** Violin plots showing the distributions of dDHS scores for DHS  
1041 overlapping with differentially expressed genes at 0.5 hours with both up-regulated (A) and  
1042 down-regulated shown (B). Mean values are shown as line. Positive dDHS scores represent  
1043 an increase in DHS accessibility and negative values represent the opposite. No clear  
1044 association is observed with up-regulated genes and positive dDHS values nor down-  
1045 regulated genes with negative dDHS values.

1046

1047 **Supplementary Fig. 5:** Line plots showing mean normalised expression values at each time  
1048 point for both *G. gynandra* and *Arabidopsis* across their respective de-etiolation time-  
1049 courses. Data shown for twenty orthogroups induced during de-etiolation with paralogs  
1050 shown. Values are quantile normalised followed by dividing by the sample mean to facilitate  
1051 expression dynamics and abundance comparisons across the species.

1052

1053 **Supplementary Fig. 6:** Line plots showing mean normalised expression values at each time  
1054 point for both *O. sativa* and *Z. mays* across their respective de-etiolation time-courses. Data  
1055 from a monocot de-etiolation study<sup>44</sup> and processed in the same way as described for the  
1056 data in this study. Many orthogroups showed a similar pattern as for the *G. gynandra* and  
1057 *Arabidopsis* comparison with one or more  $C_4$  (*Z. mays*) paralog showing much higher  
1058 abundance than other members of the orthogroup.

1059

1060 **Supplementary Fig. 7:** DGF binding in different  $C_4$  cycle genes during de-etiolation time  
1061 course in *G. gynandra*.

1062

1063 **Supplementary Fig. 8:** Unrooted phylogenetic tree of homeodomain protein sequences  
1064 taken from both *G. gynandra* and *Arabidopsis*. Analysis was carried out using the ete3  
1065 pipeline and visualised with the iTOL web tool. Each leaf is annotated, where available, with  
1066 the ratio of the bundle sheath to mesophyll expression values taken from publicly available  
1067 datasets. The HD-Zip IV family is shown to be consistently mesophyll preferentially  
1068 expressed in both species in contrast to the HD-Zip III family. Major family names  
1069 and individual gene names of interest are shown.

1070

## 1071 REFERENCES

- 1072 1. Bowes, G., Ogren, W. L. & Hageman, R. H. Phosphoglycolate production catalyzed  
1073 by ribulose diphosphate carboxylase. *Biochem. Biophys. Res. Commun.* **45**, 716–722  
1074 (1971).
- 1075 2. Tolbert, N. E. & Essner, E. Microbodies: Peroxisomes and glyoxysomes. *J. Cell Biol.*  
1076 **91**, 271s-283s (1981).
- 1077 3. Bauwe, H., Hagemann, M. & Fernie, A. R. Photorespiration: players, partners and  
1078 origin. *Trends in Plant Science* vol. 15 330–336 (2010).
- 1079 4. Hatch, M. D. C<sub>4</sub> photosynthesis: a unique blend of modified biochemistry, anatomy  
1080 and ultrastructure. *BBA Reviews On Bioenergetics* vol. 895 81–106 (1987).
- 1081 5. Furbank, R. T. Evolution of the C<sub>4</sub> photosynthetic mechanism: Are there really three  
1082 C<sub>4</sub> acid decarboxylation types? *Journal of Experimental Botany* vol. 62 3103–3108  
1083 (2011).
- 1084 6. Sage, R. F. & Zhu, X. G. Exploiting the engine of C<sub>4</sub> photosynthesis. *J. Exp. Bot.* **62**,  
1085 2989–3000 (2011).
- 1086 7. Sage, R. F. A portrait of the C<sub>4</sub> photosynthetic family on the 50<sup>th</sup> anniversary of its  
1087 discovery: Species number, evolutionary lineages, and Hall of Fame. *Journal of*  
1088 *Experimental Botany* vol. 67 4039–4056 (2016).
- 1089 8. Hibberd, J. M. & Covshoff, S. The Regulation of Gene Expression Required for C<sub>4</sub>  
1090 Photosynthesis. *Annu. Rev. Plant Biol.* **61**, 181–207 (2010).
- 1091 9. Burnell, J. N., Suzuki, I. & Sugiyama, T. Light Induction and the Effect of Nitrogen  
1092 Status upon the Activity of Carbonic Anhydrase in Maize Leaves. *Plant Physiol.* **94**,  
1093 384–387 (1990).
- 1094 10. Glackin, C. A. & Grula, J. W. Organ-specific transcripts of different size and  
1095 abundance derive from the same pyruvate, orthophosphate dikinase gene in maize.  
1096 *Proc. Natl. Acad. Sci. U. S. A.* **87**, 3004–3008 (1990).
- 1097 11. Gowik, U. *et al.* cis-regulatory elements for mesophyll-specific gene expression in the  
1098 C<sub>4</sub> plant *Flaveria trinervia*, the promoter of the C<sub>4</sub> phosphoenolpyruvate carboxylase  
1099 gene. *Plant Cell* **16**, 1077–1090 (2004).



- 1100 12. Brown, N. J. *et al.* Independent and parallel recruitment of preexisting mechanisms  
1101 underlying C<sub>4</sub> photosynthesis. *Science* **331**, 1436–1439 (2011).
- 1102 13. Reyna-Llorens, I. *et al.* Ancient duons may underpin spatial patterning of gene  
1103 expression in C<sub>4</sub> leaves. *Proc. Natl. Acad. Sci. U. S. A.* **115**, 1931–1936 (2018).
- 1104 14. Williams, B. P. *et al.* An untranslated cis-element regulates the accumulation of  
1105 multiple C<sub>4</sub> enzymes in *Gynandropsis gynandra* mesophyll cells. *Plant Cell* **28**, 454–  
1106 465 (2016).
- 1107 15. Kajala, K. *et al.* Multiple Arabidopsis genes primed for recruitment into C<sub>4</sub>  
1108 photosynthesis. *Plant J.* **69**, 47–56 (2012).
- 1109 16. Stockhaus, J., Poetsch, W., Steinmüller, K. & Westhoff, P. Evolution of the C<sub>4</sub>  
1110 phosphoenolpyruvate carboxylase promoter of the C<sub>4</sub> dicot *Flaveria trinervia*: an  
1111 expression analysis in the C<sub>3</sub> plant tobacco. *MGG Mol. Gen. Genet.* **245**, 286–293  
1112 (1994).
- 1113 17. Stockhaus, J. *et al.* The promoter of the gene encoding the C<sub>4</sub> form of  
1114 phosphoenolpyruvate carboxylase directs mesophyll-specific expression in transgenic  
1115 C<sub>4</sub> *Flaveria* spp. *Plant Cell* **9**, 479–489 (1997).
- 1116 18. Matsuoka, M., Kyojuka, J., Shimamoto, K. & Kano-Murakami, Y. The promoters of  
1117 two carboxylases in a C<sub>4</sub> plant (maize) direct cell-specific, light-regulated expression  
1118 in a C<sub>3</sub> plant (rice). *Plant J.* **6**, 311–319 (1994).
- 1119 19. Nomura, M. *et al.* The evolution of C<sub>4</sub> plants: Acquisition of cis-regulatory sequences  
1120 in the promoter of C<sub>4</sub>-type pyruvate, orthophosphate dikinase gene. *Plant J.* **22**, 211–  
1121 221 (2000).
- 1122 20. Nomura, M. *et al.* The promoter for C<sub>4</sub>-type mitochondrial aspartate aminotransferase  
1123 does not direct bundle sheath-specific expression in transgenic rice plants. *Plant Cell*  
1124 *Physiol.* **46**, 743–753 (2005).
- 1125 21. Argüello-Astorga, G. R. & Herrera-Estrella, L. R. Ancestral multipartite units in light-  
1126 responsive plant promoters have structural features correlating with specific  
1127 phototransduction pathways. *Plant Physiol.* **112**, 1151–1166 (1996).
- 1128 22. Acevedo-Hernández, G. J., León, P. & Herrera-Estrella, L. R. Sugar and ABA  
1129 responsiveness of a minimal RBCS light-responsive unit is mediated by direct binding  
1130 of ABI4. *Plant J.* **43**, 506–519 (2005).
- 1131 23. Burgess, S. J. *et al.* Ancestral light and chloroplast regulation form the foundations for  
1132 C<sub>4</sub> gene expression. *Nat. Plants* **2**, (2016).
- 1133 24. Pribil, M., Labs, M. & Leister, D. Structure and dynamics of thylakoids in land plants.  
1134 *J. Exp. Bot.* **65**, 1955–1972 (2014).
- 1135 25. Bahl, J., Francke, B. & Monéger, R. Lipid composition of envelopes, prolamellar  
1136 bodies and other plastid membranes in etiolated, green and greening wheat leaves.

- 1137 *Planta* **129**, 193–201 (1976).
- 1138 26. Ryberg, M. & Sundqvist, C. Characterization of prolamellar bodies and prothylakoids  
1139 fractionated from wheat etioplasts. *Physiol. Plant.* **56**, 125–132 (1982).
- 1140 27. Ryberg, M. & Sundqvist, C. The regular ultrastructure of isolated prolamellar bodies  
1141 depends on the presence of membrane-bound NADPH-protochlorophyllide  
1142 oxidoreductase. *Physiol. Plant.* **73**, 218–226 (1988).
- 1143 28. Park, H., Kreunen, S. S., Cuttriss, A. J., DellaPenna, D. & Pogson, B. J. Identification  
1144 of the carotenoid isomerase provides insight into carotenoid biosynthesis, prolamellar  
1145 body formation, and photomorphogenesis. *Plant Cell* **14**, 321–332 (2002).
- 1146 29. Armarego-Marriott, T. *et al.* Highly resolved systems biology to dissect the etioplast-  
1147 to-chloroplast transition in tobacco leaves. *Plant Physiol.* **180**, 654–681 (2019).
- 1148 30. Dubreuil, C. *et al.* Establishment of photosynthesis through chloroplast development  
1149 is controlled by two distinct regulatory phases. *Plant Physiol.* **176**, 1199–1214 (2018).
- 1150 31. Mizoguchi, T. *et al.* LHY and CCA1 are partially redundant genes required to maintain  
1151 circadian rhythms in Arabidopsis. *Dev. Cell* **2**, 629–641 (2002).
- 1152 32. Leivar, P. *et al.* The Arabidopsis phytochrome-interacting factor PIF7, together with  
1153 PIF3 and PIF4, regulates responses to prolonged red light by modulating phyB levels.  
1154 *Plant Cell* **20**, 337–352 (2008).
- 1155 33. Liu, Y. *et al.* Genome-wide mapping of DNase I hypersensitive sites reveals chromatin  
1156 accessibility changes in Arabidopsis euchromatin and heterochromatin regions under  
1157 extended darkness. *Sci. Rep.* **7**, 1–15 (2017).
- 1158 34. He, H. H. *et al.* Differential DNase I hypersensitivity reveals factor-dependent  
1159 chromatin dynamics. *Genome Res.* **22**, 1015–1025 (2012).
- 1160 35. O'Malley, R. C. *et al.* Cistrome and Epicistrome Features Shape the Regulatory DNA  
1161 Landscape. *Cell* **165**, 1280–1292 (2016).
- 1162 36. Franco-Zorrilla, J. M. *et al.* DNA-binding specificities of plant transcription factors and  
1163 their potential to define target genes. *Proc. Natl. Acad. Sci. U. S. A.* **111**, 2367–2372  
1164 (2014).
- 1165 37. Grant, C. E., Bailey, T. L. & Noble, W. S. FIMO: Scanning for occurrences of a given  
1166 motif. *Bioinformatics* **27**, 1017–1018 (2011).
- 1167 38. McLeay, R. C. & Bailey, T. L. Motif Enrichment Analysis: A unified framework and an  
1168 evaluation on ChIP data. *BMC Bioinformatics* **11**, 165 (2010).
- 1169 39. Green, P. J., Kay, S. A. & Chua, N. H. Sequence-specific interactions of a pea nuclear  
1170 factor with light-responsive elements upstream of the *rbcS-3A* gene. *EMBO J.* **6**,  
1171 2543–2549 (1987).
- 1172 40. Giuliano, G. *et al.* An evolutionarily conserved protein binding sequence upstream of a  
1173 plant light-regulated gene. *Proc. Natl. Acad. Sci. U. S. A.* **85**, 7089–7093 (1988).



- 1174 41. He, H. H. *et al.* Refined DNase-seq protocol and data analysis reveals intrinsic bias in  
1175 transcription factor footprint identification. *Nat. Methods* **11**, 73–78 (2014).
- 1176 42. Yardimci, G. G., Frank, C. L., Crawford, G. E. & Ohler, U. Explicit DNase sequence  
1177 bias modeling enables high-resolution transcription factor footprint detection. *Nucleic*  
1178 *Acids Res.* **42**, 11865–11878 (2014).
- 1179 43. Sullivan, A. M. *et al.* Mapping and dynamics of regulatory DNA and transcription factor  
1180 networks in *A. thaliana*. *Cell Rep.* **8**, 2015–2030 (2014).
- 1181 44. Xu, J., Bräutigam, A., Li, Y., Weber, A. P. M. & Zhu, X.-G. Systems analysis of cis-  
1182 regulatory motifs in C<sub>4</sub> photosynthesis genes using maize and rice leaf transcriptomic  
1183 data during a process of de-etiolation. *J. Exp. Bot.* **67**, 5105–5117 (2016).
- 1184 45. Waters, M. T. *et al.* GLK transcription factors coordinate expression of the  
1185 photosynthetic apparatus in *Arabidopsis*. *Plant Cell* **21**, 1109–1128 (2009).
- 1186 46. Xu, Z., Casaretto, J. A., Bi, Y.-M. & Rothstein, S. J. Genome-wide binding analysis of  
1187 AtGNC and AtCGA1 demonstrates their cross-regulation and common and specific  
1188 functions. *Plant Direct* **1**, e00016 (2017).
- 1189 47. Aubry, S., Smith-Unna, R. D., Bournnell, C. M., Kopriva, S. & Hibberd, J. M. Transcript  
1190 residency on ribosomes reveals a key role for the *Arabidopsis thaliana* bundle sheath  
1191 in sulfur and glucosinolate metabolism. *Plant J.* **78**, 659–673 (2014).
- 1192 48. Aubry, S., Kelly, S., Kümpers, B. M. C., Smith-Unna, R. D. & Hibberd, J. M. Deep  
1193 Evolutionary Comparison of Gene Expression Identifies Parallel Recruitment of Trans-  
1194 Factors in Two Independent Origins of C<sub>4</sub> Photosynthesis. *PLoS Genet.* **10**, (2014).
- 1195 49. Kirk, J. T. O. & Tilney-Bassett, R. A. E. *The Plastids*. (Elsevier/North-Holland  
1196 Biomedical Press, 1967).
- 1197 50. Boffey, S. A., Selldén, G. & Leech, R. M. Influence of Cell Age on Chlorophyll  
1198 Formation in Light-grown and Etiolated Wheat Seedlings. *Plant Physiol.* **65**, 680–684  
1199 (1980).
- 1200 51. Virgin, H. I., Kahn, A. & von Wettstein, D. The Physiology of Chlorophyll Formation in  
1201 Relation to Structural Changes in Chloroplasts. *Photochem. Photobiol.* **2**, 83–91  
1202 (1963).
- 1203 52. Thorne, S. W. & Boardman, N. K. Formation of Chlorophyll b, and the Fluorescence  
1204 Properties and Photochemical Activities of Isolated Plastids from Greening Pea  
1205 Seedlings. *Plant Physiol.* **47**, 252–261 (1971).
- 1206 53. Høyer-Hansen, G. & Simpson, D. J. Changes in the polypeptide composition of  
1207 internal membranes of barley plastids during greening. *Carlsberg Res. Commun.* **42**,  
1208 379–389 (1977).
- 1209 54. Bennett, J. Chloroplast protein phosphorylation and the regulation of photosynthesis.  
1210 *Physiol. Plant.* **60**, 583–590 (1984).

- 1211 55. Demeter, S., Mustardy, L. & Machowicz, E. The development of the intense circular  
1212 dichroic signal during granum formation in greening etiolated maize. *Biochem. J.* **156**,  
1213 469–472 (1976).
- 1214 56. Lonosky, P. M. *et al.* A Proteomic Analysis of Maize Chloroplast Biogenesis. *Plant*  
1215 *Physiol.* **134**, 560–574 (2004).
- 1216 57. Cahoon, A. B., Takacs, E. M., Sharpe, R. M. & Stern, D. B. Nuclear, chloroplast, and  
1217 mitochondrial transcript abundance along a maize leaf developmental gradient. *Plant*  
1218 *Mol. Biol.* **66**, 33–46 (2008).
- 1219 58. Koteyeva, N. K., Voznesenskaya, E. V., Roalson, E. H. & Edwards, G. E. Diversity in  
1220 forms of C<sub>4</sub> in the genus *Cleome* (Cleomaceae). *Ann. Bot.* **107**, 269–283 (2011).
- 1221 59. Bahl, J., Francke, B. & Monéger, R. Lipid composition of envelopes, prolamellar  
1222 bodies and other plastid membranes in etiolated, green and greening wheat leaves.  
1223 *Planta* **129**, 193–201 (1976).
- 1224 60. Baker, N. R. & Butler, W. L. Development of the Primary Photochemical Apparatus of  
1225 Photosynthesis during Greening of Etiolated Bean Leaves. *Plant Physiol.* **58**, 526–529  
1226 (1976).
- 1227 61. Boardman, N. K. Development of Chloroplast Structure and Function. in  
1228 *Photosynthesis I* 583–600 (Springer Berlin Heidelberg, 1977). doi:10.1007/978-3-642-  
1229 66505-9\_42.
- 1230 62. Krupinska, K. & Apel, K. Light-induced transformation of etioplasts to chloroplasts of  
1231 barley without transcriptional control of plastid gene expression. *MGG Mol. Gen.*  
1232 *Genet.* **219**, 467–473 (1989).
- 1233 63. Boasson, R. & Laetsch, W. M. Chloroplast replication and growth in tobacco. *Science*  
1234 **166**, 749–751 (1969).
- 1235 64. Stergachis, A. B. *et al.* Developmental fate and cellular maturity encoded in human  
1236 regulatory DNA landscapes. *Cell* **154**, 888–903 (2013).
- 1237 65. Arnold, C. D. *et al.* Genome-wide quantitative enhancer activity maps identified by  
1238 STARR-seq. *Science* **339**, 1074–1077 (2013).
- 1239 66. Bräutigam, A. *et al.* An mRNA blueprint for C<sub>4</sub> photosynthesis derived from  
1240 comparative transcriptomics of closely related C<sub>3</sub> and C<sub>4</sub> species. *Plant Physiol.* **155**,  
1241 142–156 (2011).
- 1242 67. Külahoglu, C. *et al.* Comparative transcriptome atlases reveal altered gene  
1243 expression modules between two Cleomaceae C<sub>3</sub> and C<sub>4</sub> plant species. *Plant Cell* **26**,  
1244 3243–3260 (2014).
- 1245 68. Gowik, U., Bräutigam, A., Weber, K. L., Weber, A. P. M. & Westhoff, P. Evolution of  
1246 C<sub>4</sub> photosynthesis in the genus *Flaveria*: How many and which genes does it take to  
1247 make C<sub>4</sub>? *Plant Cell* **23**, 2087–2105 (2011).

- 1248 69. Ariel, F. D., Manavella, P. A., Dezar, C. A. & Chan, R. L. The true story of the HD-Zip  
1249 family. *Trends in Plant Science* vol. 12 419–426 (2007).
- 1250 70. Kubo, H. & Hayashi, K. Characterization of root cells of *anl2* mutant in *Arabidopsis*  
1251 *thaliana*. *Plant Sci.* **180**, 679–685 (2011).
- 1252 71. Kubo, H., Kishi, M. & Goto, K. Expression analysis of *ANTHOCYANINLESS2* gene in  
1253 *Arabidopsis*. *Plant Sci.* **175**, 853–857 (2008).
- 1254 72. Martinez, E. Multi-protein complexes in eukaryotic gene transcription. *Plant Mol. Biol.*  
1255 **50**, 925–947 (2002).
- 1256 73. Rose, A., Meier, I. & Wienand, U. The tomato I-box binding factor LeMYBI is a  
1257 member of a novel class of Myb-like proteins. *Plant J.* **20**, 641–652 (1999).
- 1258 74. Richter, R., Behringer, C., Müller, I. K. & Schwechheimer, C. The GATA-type  
1259 transcription factors GNC and GNL/CGA1 repress gibberellin signaling downstream  
1260 from DELLA proteins and phytochrome-interacting factors. *Genes Dev.* **24**, 2093–  
1261 2104 (2010).
- 1262 75. Porra, R. J., Thompson, W. A. & Kriedemann, P. E. Determination of accurate  
1263 extinction coefficients and simultaneous equations for assaying chlorophylls a and b  
1264 extracted with four different solvents: verification of the concentration of chlorophyll  
1265 standards by atomic absorption spectroscopy. *BBA - Bioenerg.* **975**, 384–394 (1989).
- 1266 76. Bolger, A. M., Lohse, M. & Usadel, B. Trimmomatic: A flexible trimmer for Illumina  
1267 sequence data. *Bioinformatics* **30**, 2114–2120 (2014).
- 1268 77. Patro, R., Duggal, G., Love, M. I., Irizarry, R. A. & Kingsford, C. Salmon provides fast  
1269 and bias-aware quantification of transcript expression. *Nat. Methods* **14**, 417–419  
1270 (2017).
- 1271 78. Anders, S. & Huber, W. Differential expression analysis for sequence count data.  
1272 *Genome Biol.* **11**, R106 (2010).
- 1273 79. McCarthy, D. J., Chen, Y. & Smyth, G. K. Differential expression analysis of  
1274 multifactor RNA-Seq experiments with respect to biological variation. *Nucleic Acids*  
1275 *Res.* **40**, 4288–4297 (2012).
- 1276 80. Emms, D. M. & Kelly, S. OrthoFinder: Phylogenetic orthology inference for  
1277 comparative genomics. *Genome Biol.* **20**, 238 (2019).
- 1278 81. Piper, J. *et al.* Wellington: A novel method for the accurate identification of digital  
1279 genomic footprints from DNase-seq data. *Nucleic Acids Res.* **41**, (2013).
- 1280 82. Piper, J. *et al.* Wellington-bootstrap: Differential DNase-seq footprinting identifies cell-  
1281 type determining transcription factors. *BMC Genomics* **16**, 1000 (2015).
- 1282 83. Burgess, S. J. *et al.* Genome-wide transcription factor binding in leaves from C<sub>3</sub> and  
1283 C<sub>4</sub> grasses. *Plant Cell* **31**, 2297–2314 (2019).
- 1284



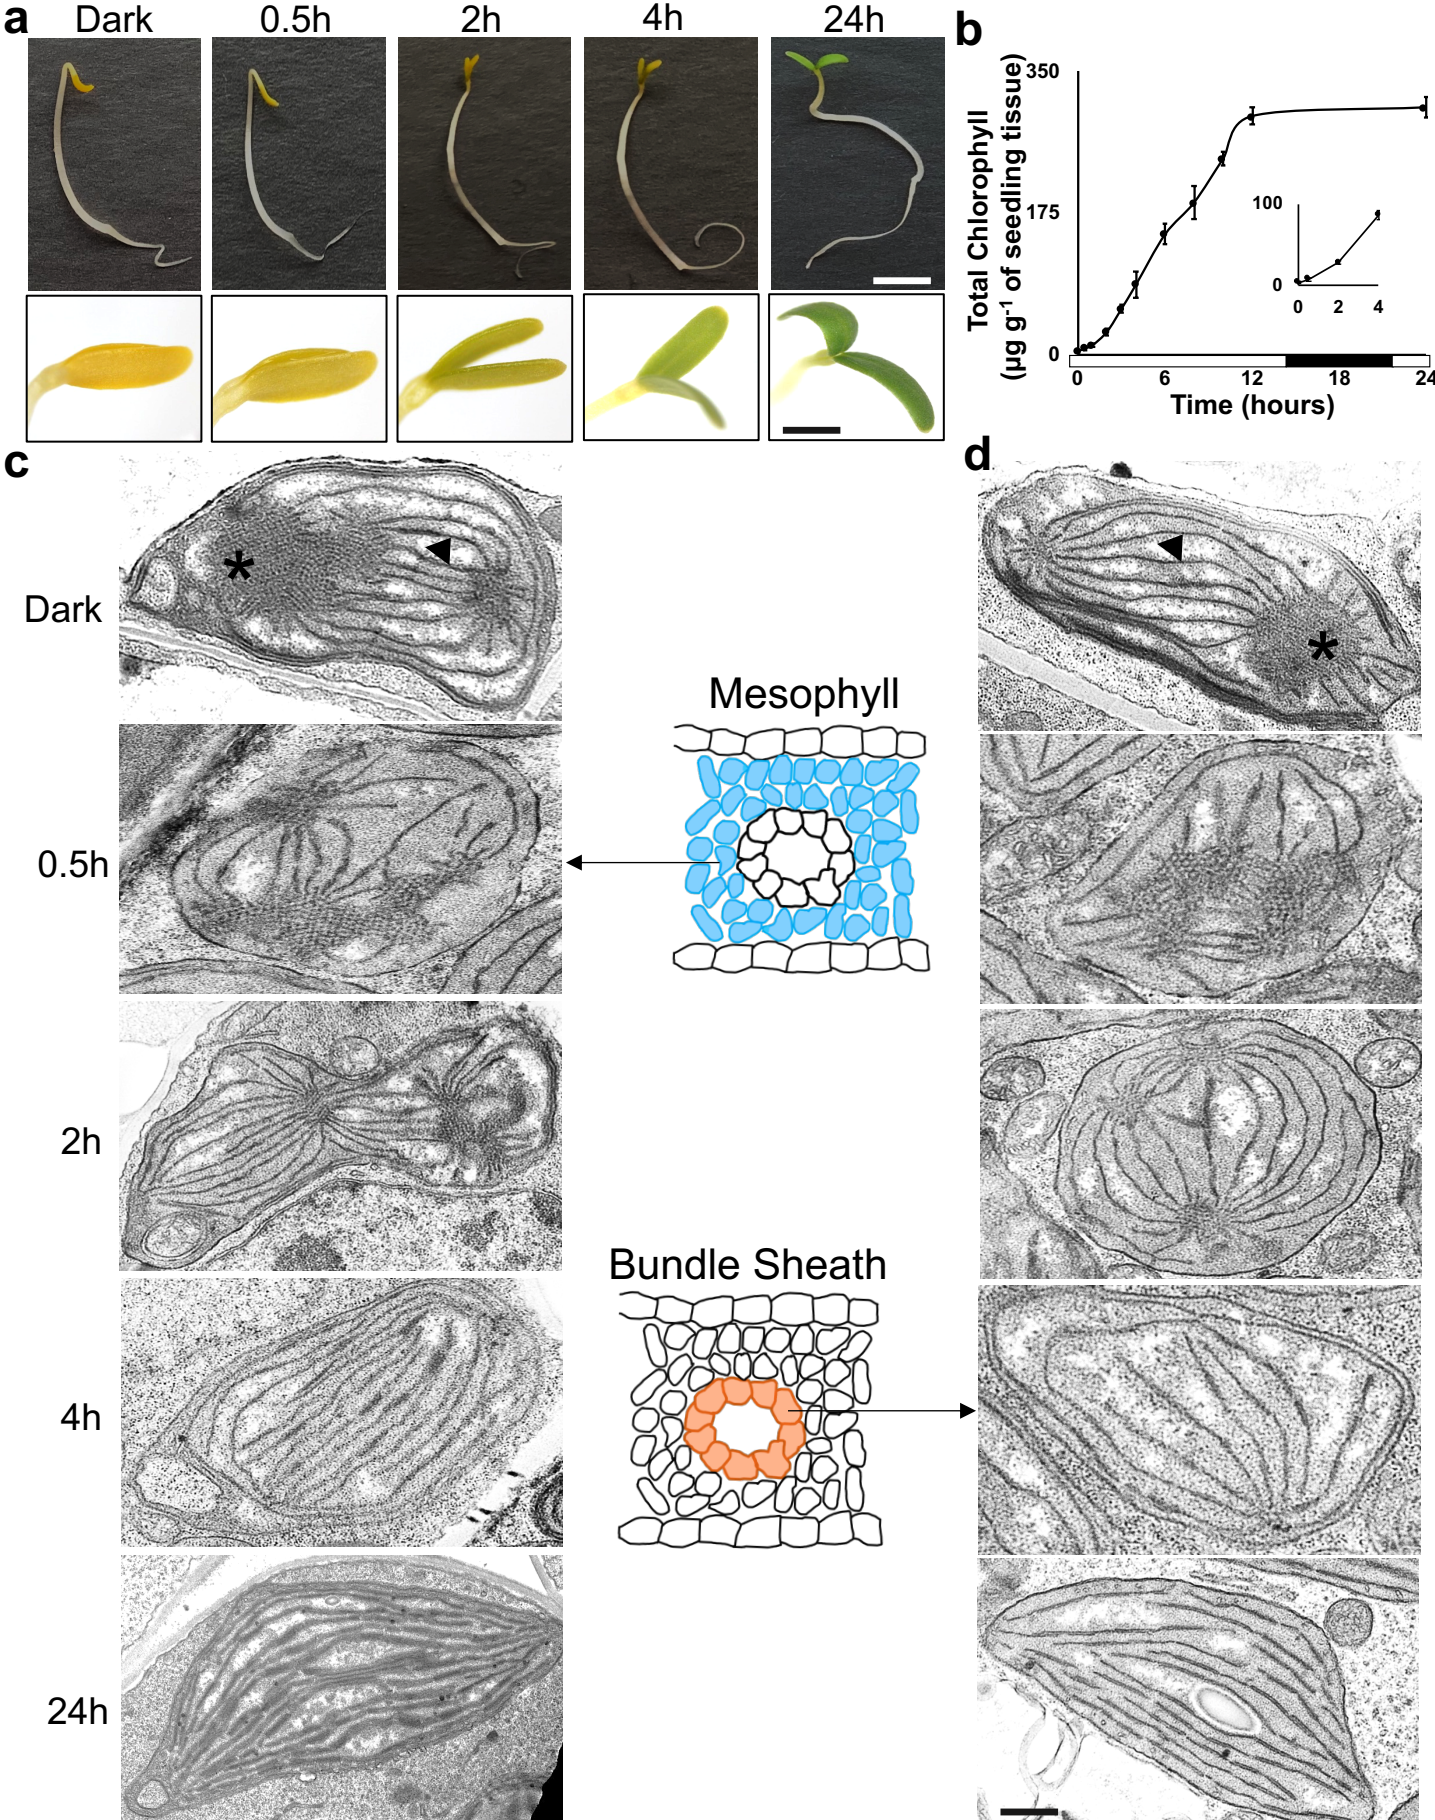

**Fig. 1: Establishment of photosynthesis in *G. gynandra*.** (a) Representative images of *Gynandropsis gynandra* seedlings illustrating greening and unhooking of the cotyledons. (b) Total chlorophyll over the time-course (data shown as means from three biological replicates at each time point,  $\pm$  one standard deviation from the mean). The first four hours show an exponential increase (inset). Bar along the x-axis indicates periods of light (0-14 hours), dark (14-22 hours) and light (22-24 hours). (c-d) Representative transmission electron microscope images of Mesophyll (c) and Bundle Sheath (d) chloroplasts of de-etiolating *G. gynandra* seedlings at 0, 0.5, 2, 4 and 24 hours after exposure to light. Asterisks and arrowheads indicate the prolamellar body and photosynthetic membranes respectively. Samples at each time were taken for RNA-SEQ and DNaseI-SEQ. Scale bars represent 0.5 mm for seedlings and 50  $\mu\text{m}$  for cotyledons (a) and 500 nm (c-d).

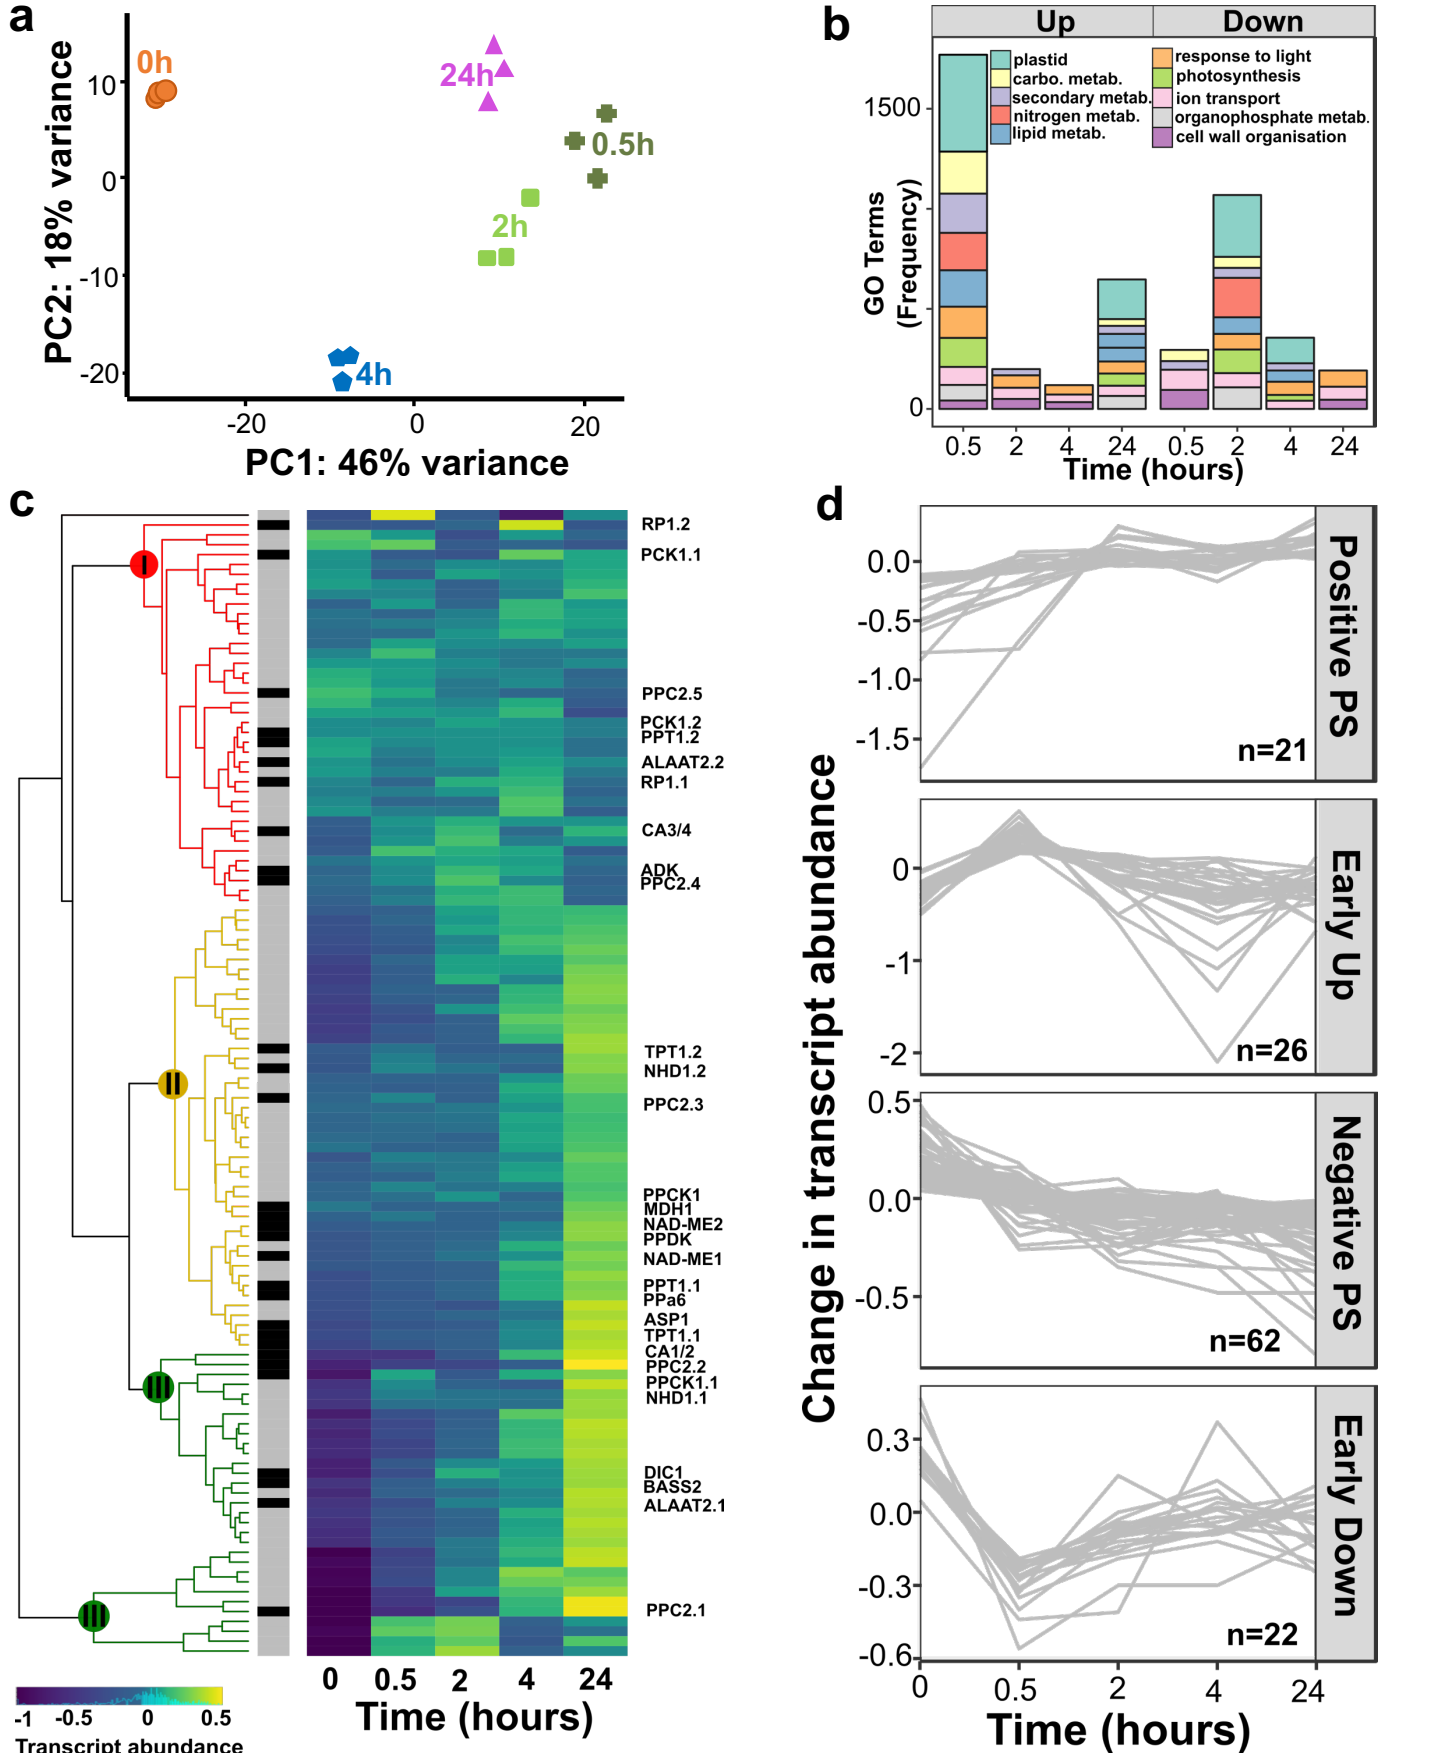

**Fig. 2: Changes in transcript abundance during greening of *G. gynandra*.** (a) Principal component analysis of RNA-Seq datasets. The three biological replicates from each timepoint of de-etiolating *G. gynandra* seedlings (0, 0.5, 2, 4 and 24 hours) form distinct clusters. (b) Enriched GO terms between consecutive timepoints for up- and down-regulated genes. (c) Heatmap illustrating changes in transcript abundance of photosynthesis (grey sidebar) and  $C_4$  photosynthesis genes (black sidebar) during the time-course. Data are shown after normalisation of expression data with each gene plotted on a row and centred around the row mean. Colour-coding of the dendrograms (red, yellow and green) highlight expression clusters representing none, moderate and strong induction respectively. (d) Line graphs depicting dynamics of transcription factors positively or negatively correlated with induced photosynthesis genes, or that showed early (0.5 hours) up- or down- regulation during the de-etiolation time-course. Values shown are normalised and centred around the mean of each gene.



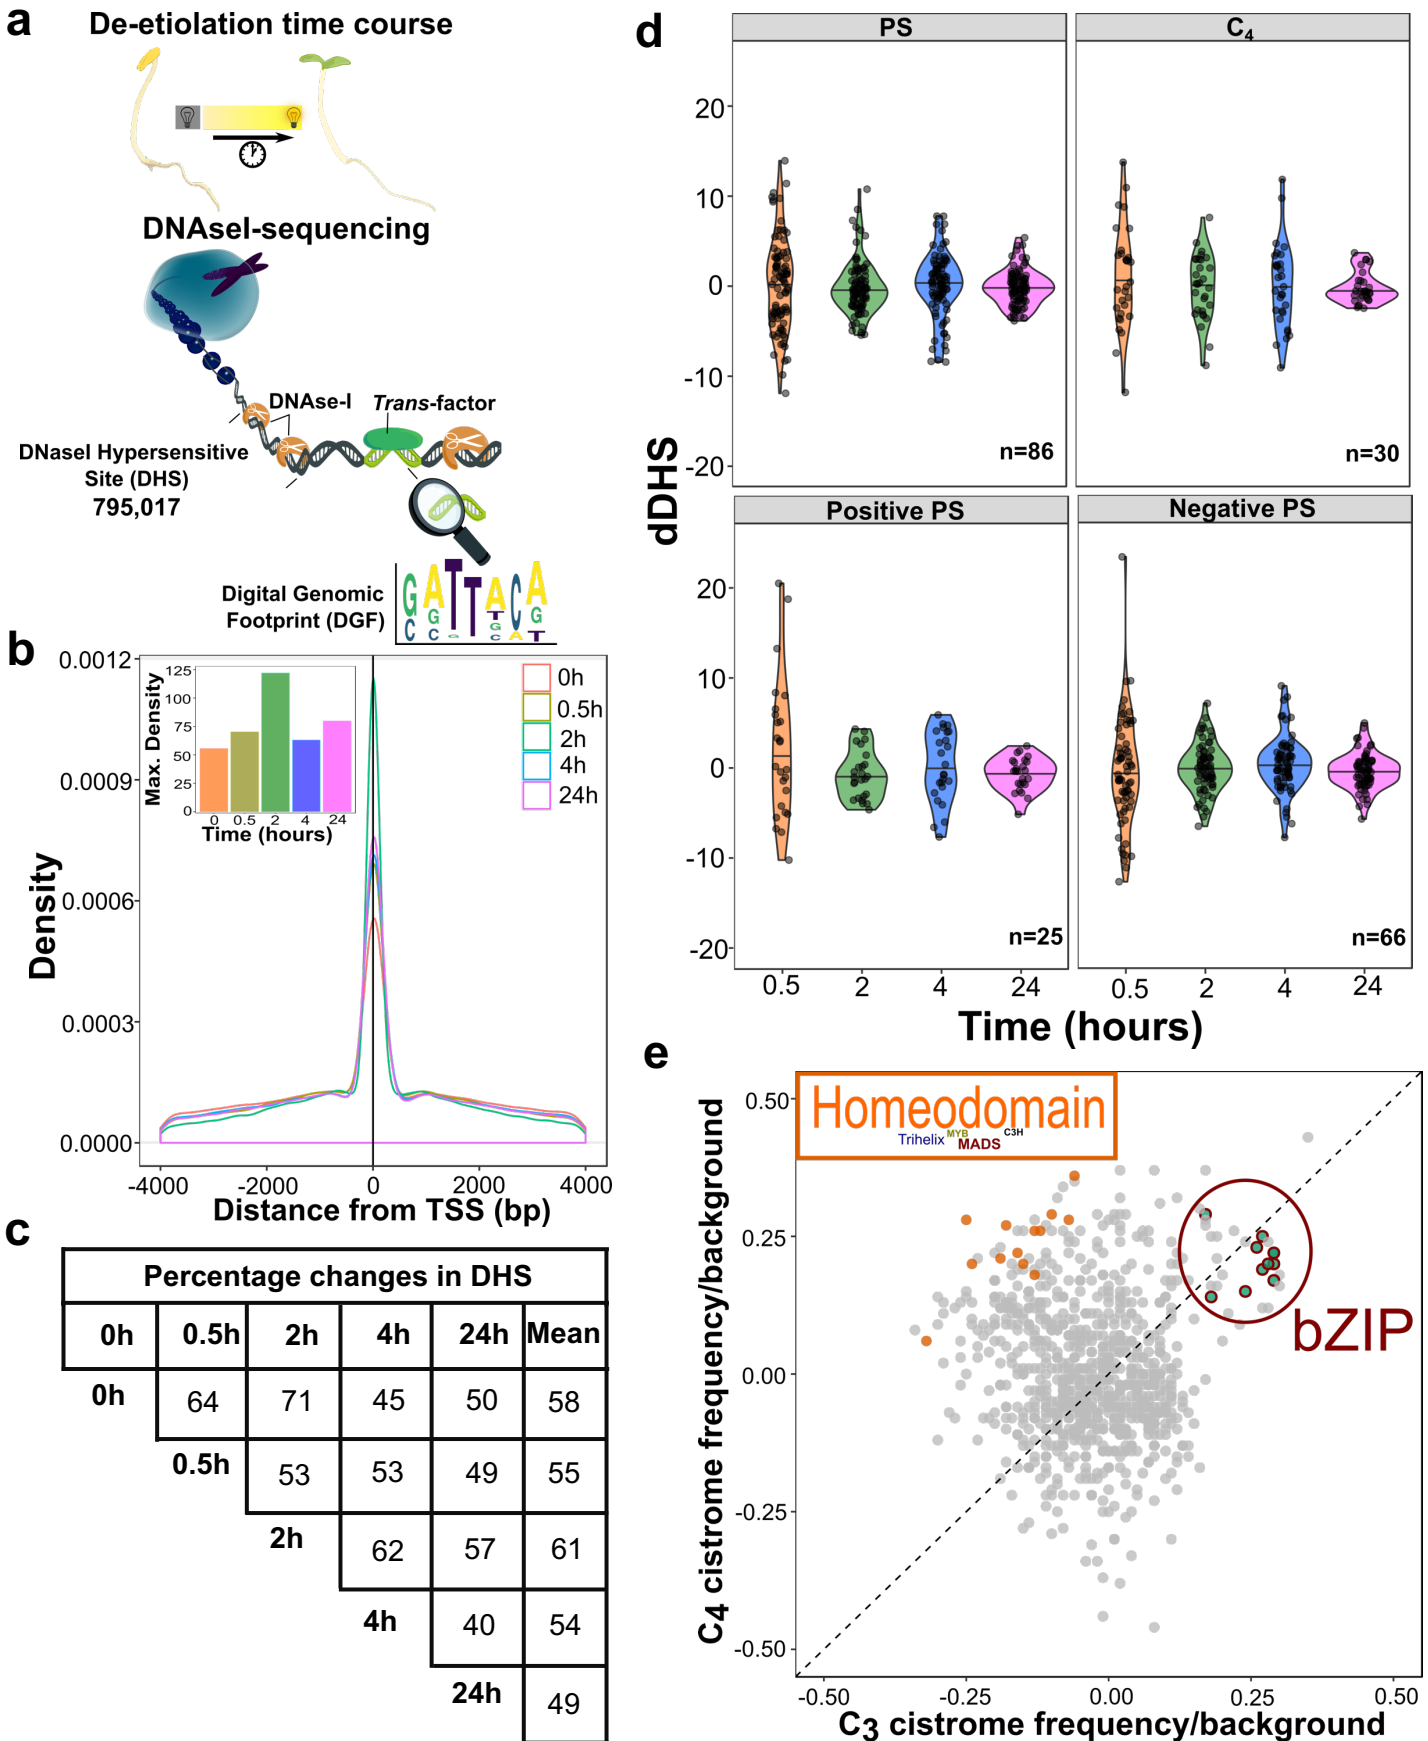

**Fig. 3: Profiling of open chromatin during de-etiolating of *G. gynandra*.** (a) Schematic illustrating DNaseI-SEQ and the total number of DNaseI-hypersensitive sites (DHSs) detected. (b) Density of open chromatin plotted relative to the nearest Transcription Start Site (TSS). Inset highlights maximum density overlapping with the TSS at each time point. (c) Percentage of DHSs non-overlapping at each timepoint. (d) Violin plots depicting changes in DHS accessibility (dDHS) associated with photosynthesis genes,  $C_4$  photosynthesis genes, and transcription factors that were positively or negatively correlated with photosynthesis genes. Changes are relative to the previous timepoint, n values are for the number of DHS regions quantified. (e) Scatter plot of FIMO motif frequencies in  $C_3$  and  $C_4$  photosynthesis gene from (log10 normalised motif frequency/normalised background frequency). Motifs annotated in orange and the associated Wordcloud highlight those enriched in the  $C_4$  cistrome compared with the  $C_3$  cistrome, and those in red indicate bZIP motifs enriched in both the  $C_3$  and  $C_4$  cistromes from both FIMO and AME analysis.



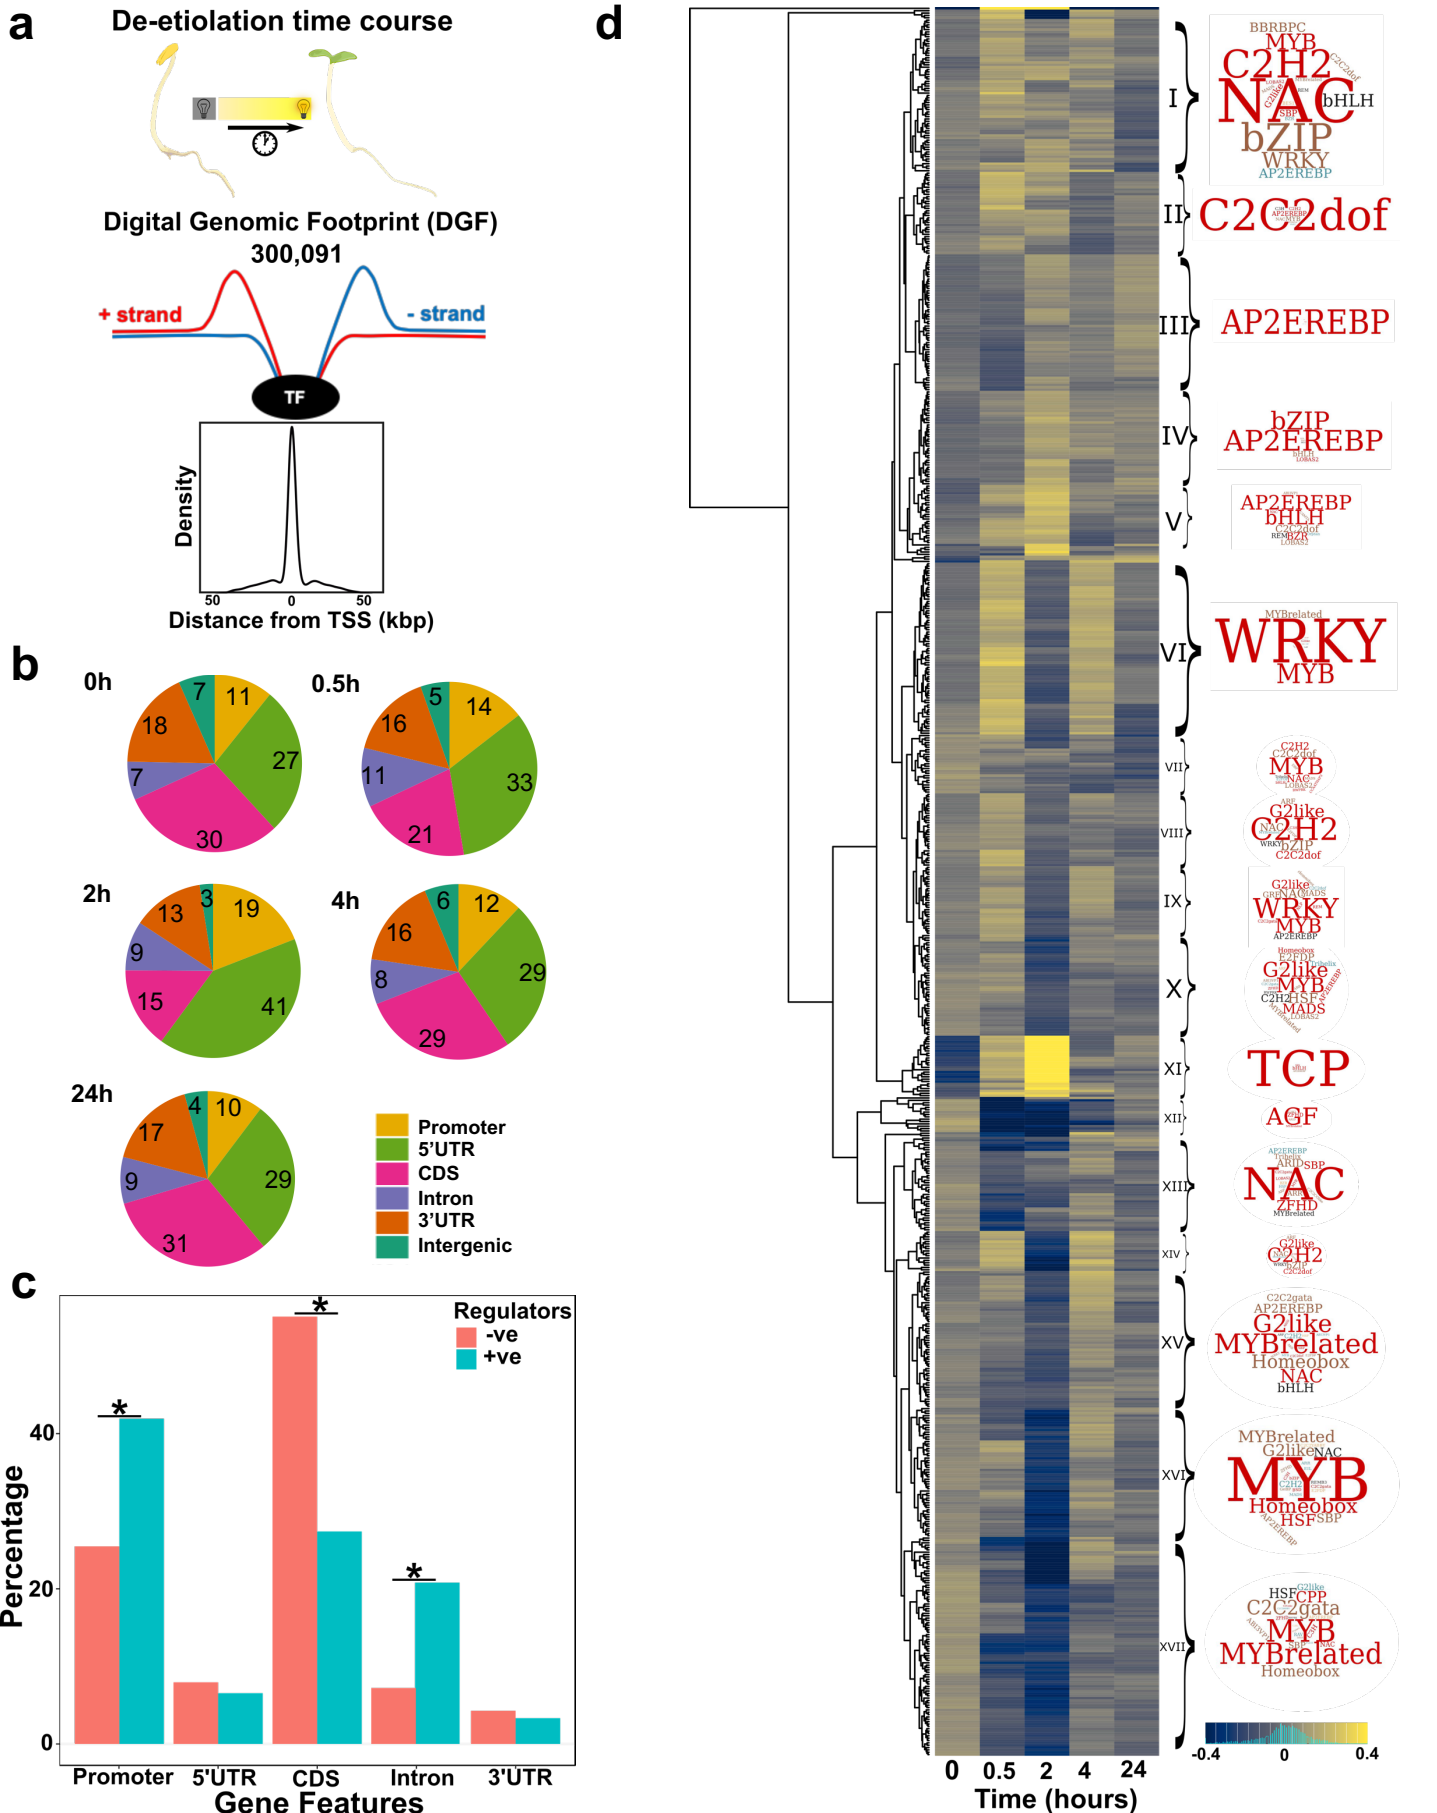

**Fig. 4: Transcription factor binding atlas for de-etiolating seedlings *G. gynandra*.** (a) Schematic illustrating sampling, number of Digital Genomic Footprints (DGF) identified and representative density plot of DGF positions relative to the nearest transcription start site (TSS). (b) Pie-charts summarising the density of DGF among genomic features. Promoters are defined as sequence < 2000 base pairs upstream of TSSs while intergenic represent any regions not overlapping with other features. Values indicate densities of DGFs in each feature as percentages. (c) Bar chart showing the percentage of DGFs predicted to function either as activators (coral bars) or repressors (turquoise bars) lying within gene features of target genes. Statistically significant differences were detected for promoters, coding sequence (CDS) and introns using a Chi square goodness of fit test ("\*"). (d) Heatmap of motif frequencies (log<sub>10</sub> sample normalised motif frequency/row mean) during de-etiolation. To illustrate identity and heterogeneity of motif groups clusters were annotated with Wordclouds.

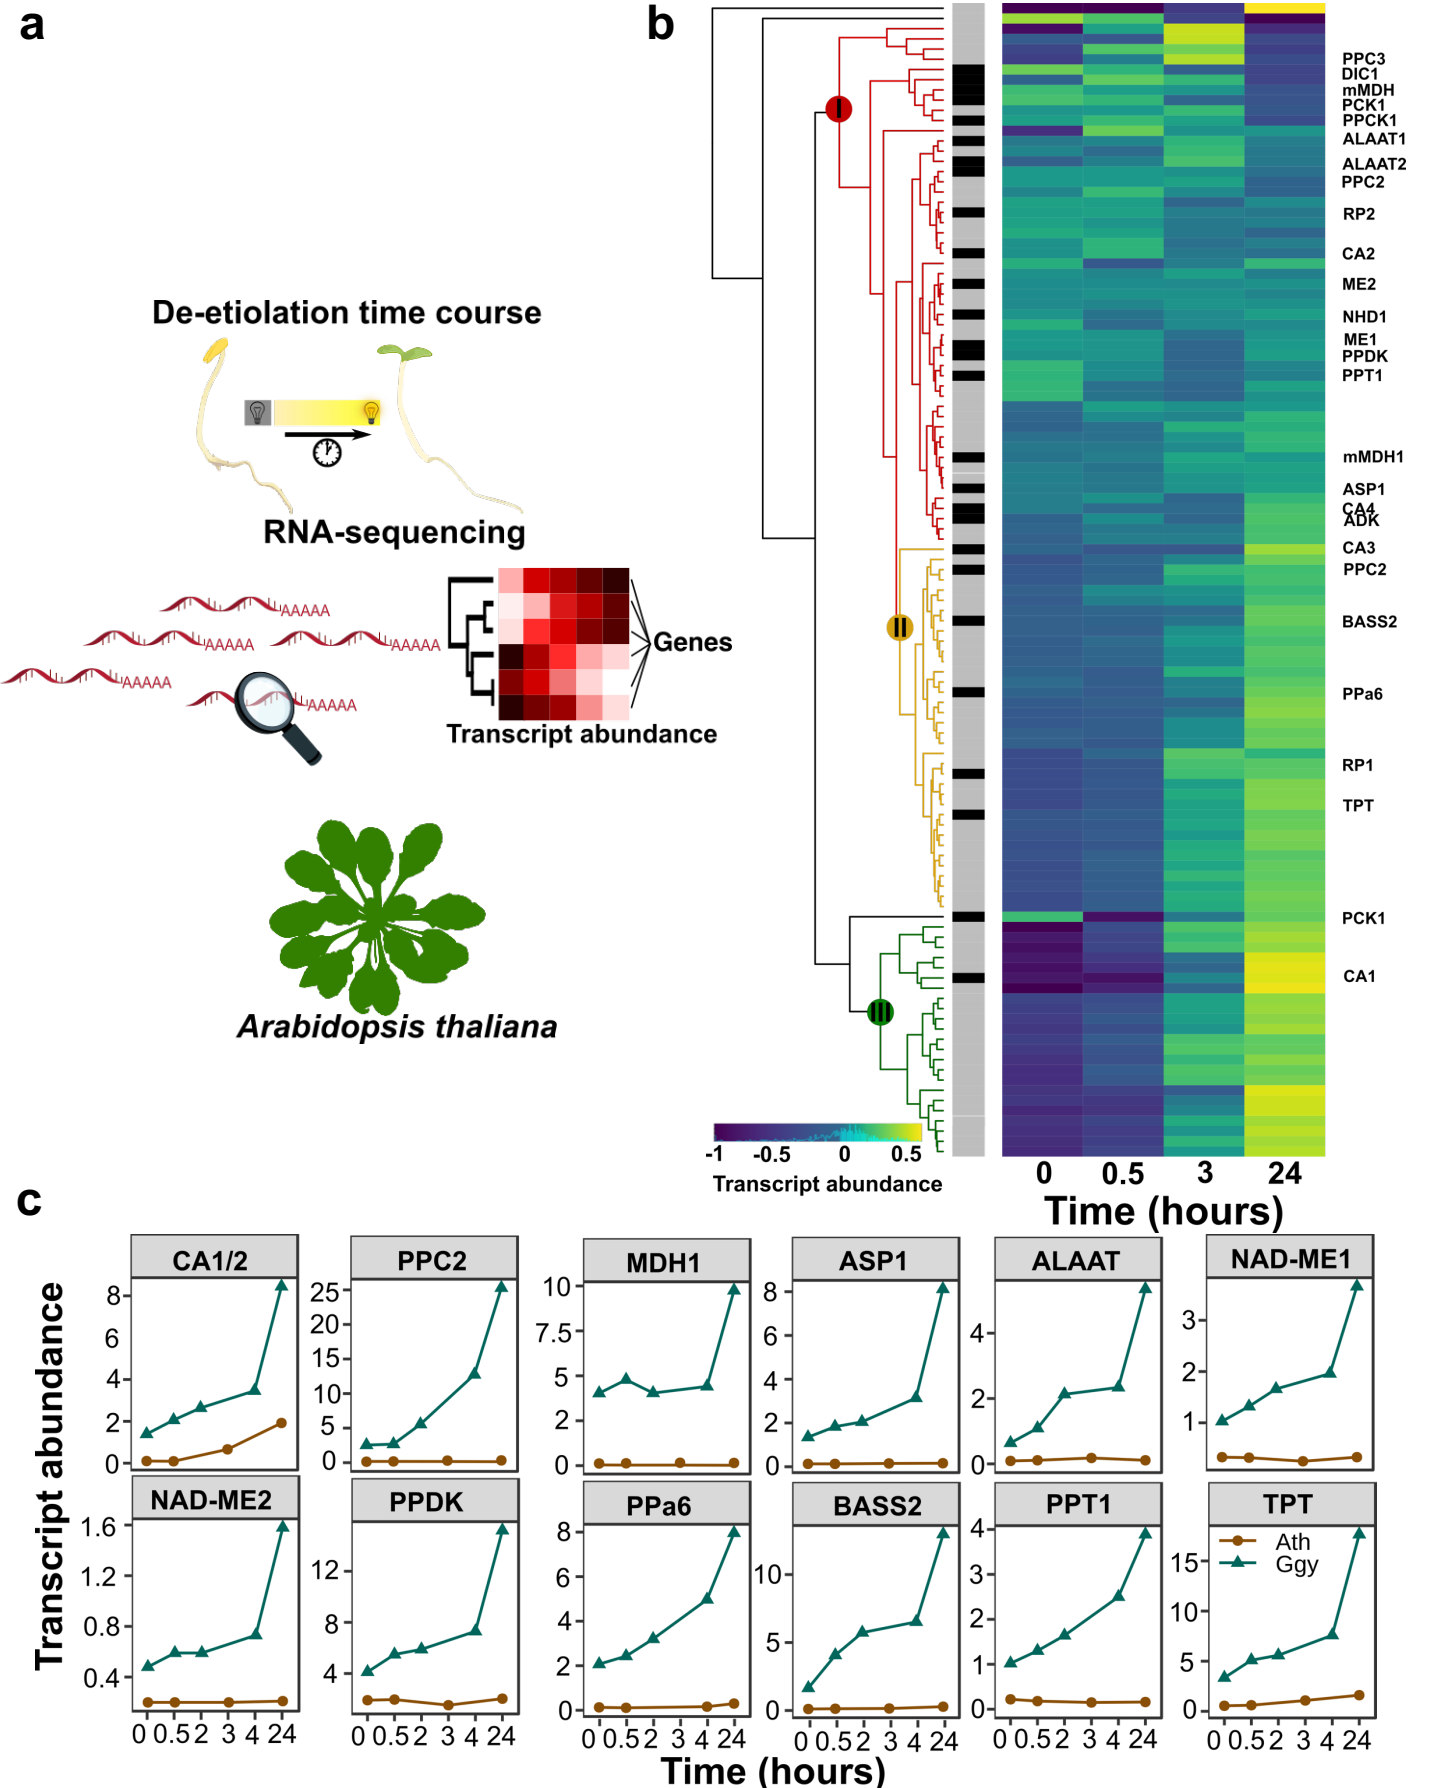

**Fig. 5: Comparison of transcript abundance for photosynthetic genes during de-etiolation of *C<sub>3</sub> Arabidopsis thaliana* and *C<sub>4</sub> G. gynandra*.** (a) Schematic illustrating RNA-SEQ of *Arabidopsis*. (b) Expression patterns of photosynthesis genes (grey sidebar) and *C<sub>4</sub>* orthologs (black sidebar) during de-etiolation. Heatmap illustrating gene expression with each gene being represented by a row, and data centred around the row mean. Dendrograms (red, yellow and green) highlight distinct expression clusters representing no clear, moderate, or strong induction. (c) Line graphs depicting quantile normalised and mean divided expression patterns of twelve *C<sub>4</sub>* orthologs in *C<sub>3</sub>* *Arabidopsis* and *C<sub>4</sub>* *G. gynandra*. Where there is more than a 1:1 relationship between genes, the most abundant paralog from each orthogroup is presented.

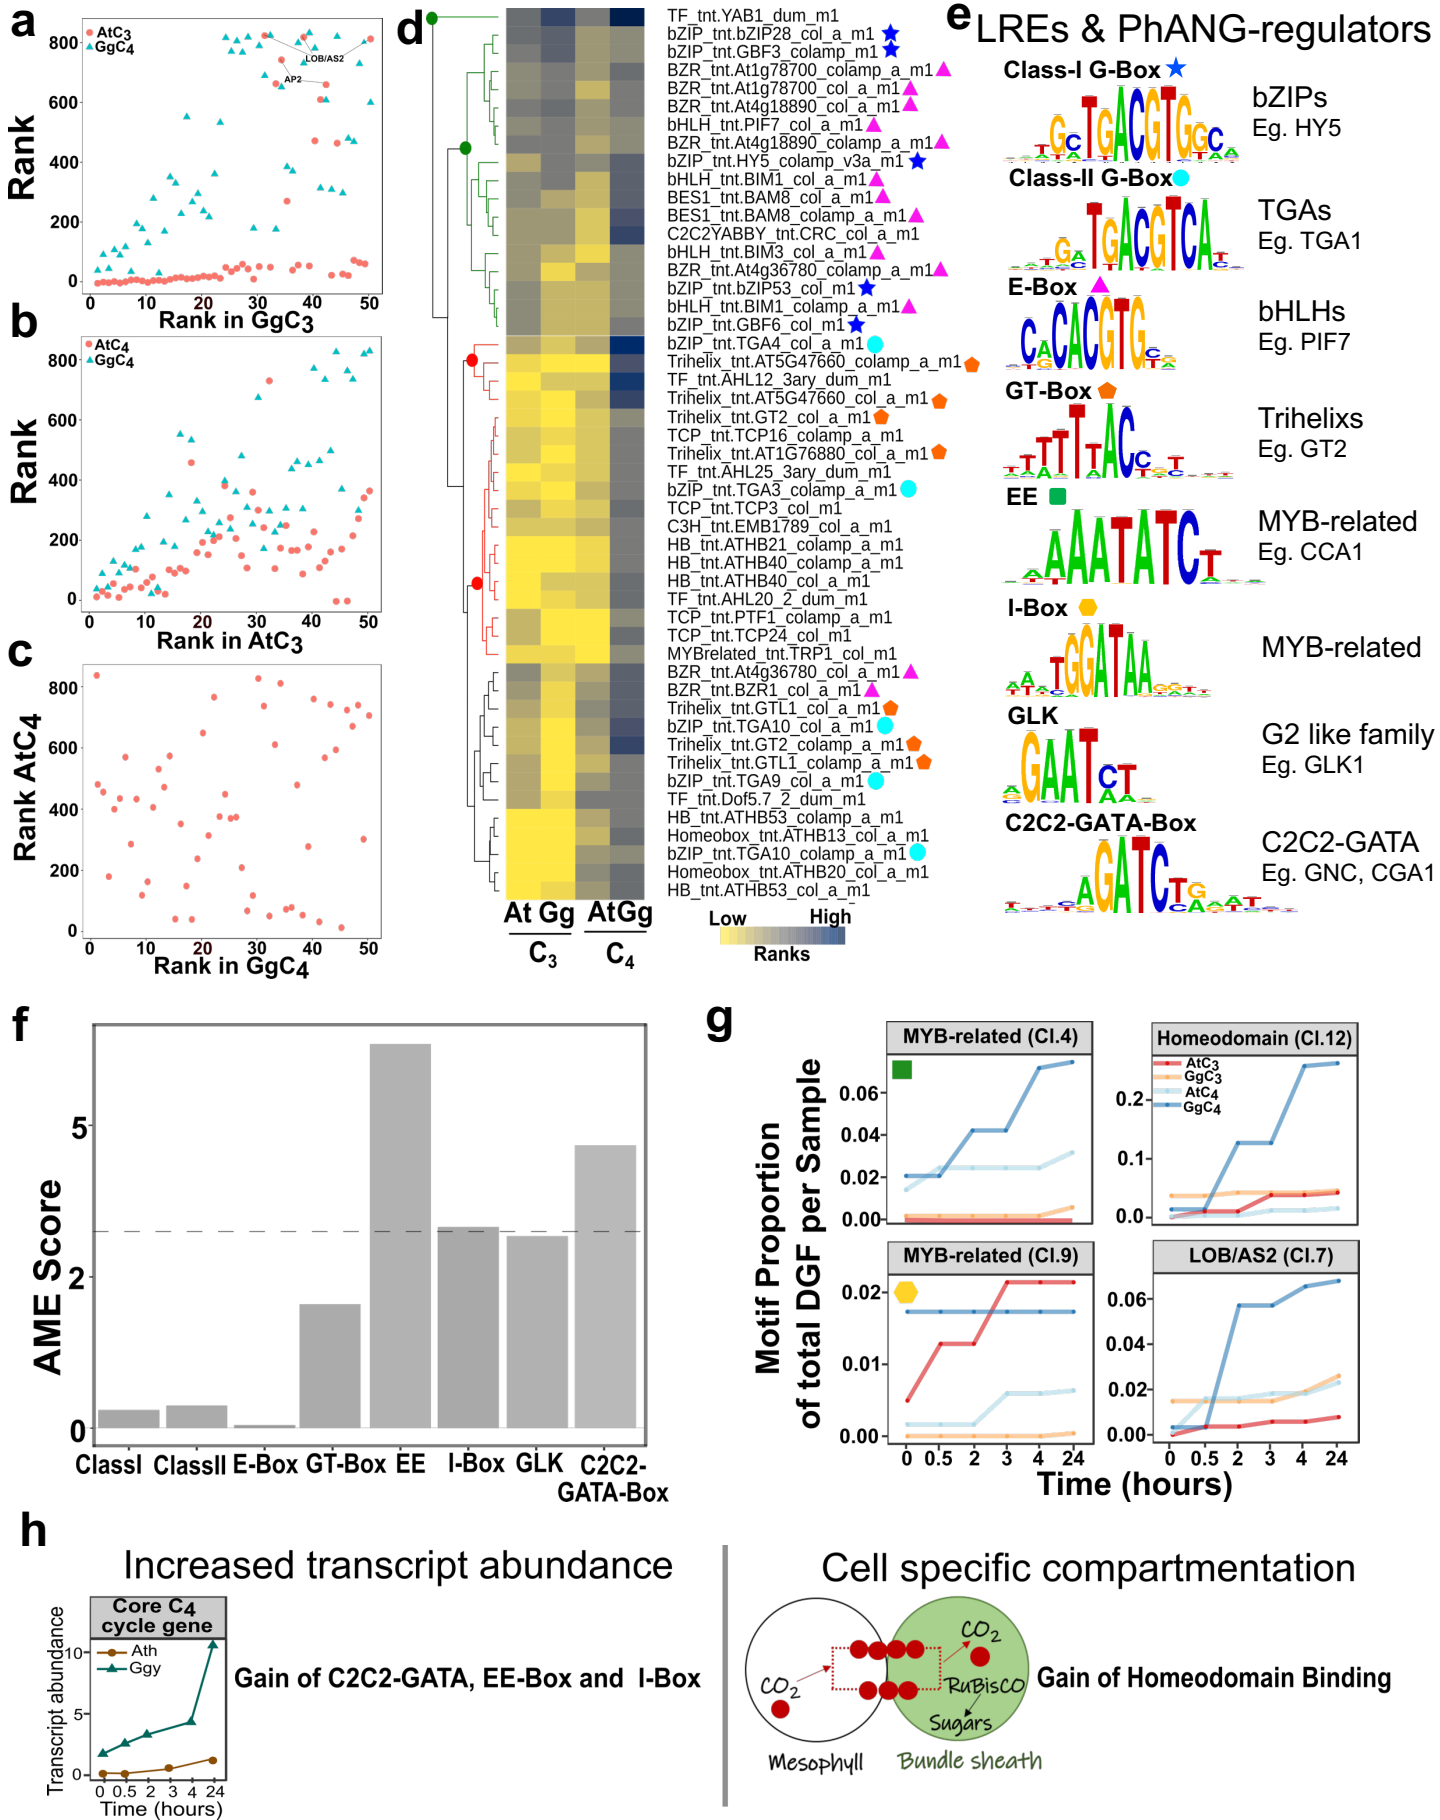

**Fig. 6: Comparative analysis of potential regulatory mechanisms for de-etiolating seedlings of C<sub>3</sub> *Arabidopsis thaliana* and C<sub>4</sub> *G. gynandra*.** Scatter plots showing the most enriched motifs in each cistrome (where 1 represents the most enriched motif). (a) Top 50 motifs in photosynthesis genes of C<sub>3</sub> *Arabidopsis* (At) and C<sub>4</sub> *G. gynandra* (Gg), (b) C<sub>4</sub> and photosynthesis genes of C<sub>3</sub> *Arabidopsis*, and (c) C<sub>4</sub> genes from C<sub>3</sub> *Arabidopsis* and *C. gynandra*. Motifs from the cistromes of C<sub>3</sub> and C<sub>4</sub> genes that showed induction during de-etiolation. (d) Heatmap of the top 50 motifs from DHSs of C<sub>4</sub> genes in *G. gynandra* compared with their

ranking in  $C_4$  genes of Arabidopsis and photosynthesis genes in both species ( $\log_2$  of the motif ranks across all four cistrome sets). Two distinct groups are highlighted with green motifs being highly ranked (more enriched) in all four cistromes while the red motifs are those specifically highly ranked in the *G. gynandra*  $C_4$  cistrome. Motifs characterised as light-regulatory elements (LREs) are labelled with symbols used in (e). (e) Sequence logos highlighting different classes of Light Responsive Elements (LREs) and regulators of photosynthesis-associated nuclear genes (PhANGs). Seqlogos were generated from DAP-SEQ and PBM consensus motifs for all members of each type. (f) Analysis of which LREs and regulators of PhANGs are statistically enriched in cistromes of  $C_4$  genes from *G. gynandra* and Arabidopsis. AME generates likelihood score for over-representation ( $-1 \cdot \log(\text{adjusted p-value})$ , y-axis), and the adjusted  $p < 0.05$  is illustrated with a dashed line. (g) Transcription factor binding sites associated with EE and I-box binding as well as the homeodomain and LOB/AS2 families disproportionately found in  $C_4$  genes from *G. gynandra* compared with orthologs from Arabidopsis, and photosynthesis genes in both species. Values plotted are the motif proportion of the total number of DGF at each sample over the time-course such that differences between and within experiments were normalised. (h) Model illustrating association between enhanced  $C_4$  cycle gene expression in *G. gynandra* compared with Arabidopsis and gain of *cis*-elements bound by MYB-related and C2C2-GATA transcription factors as well as the gain of homeodomain binding sites in mesophyll expressed genes in  $C_4$  *G. gynandra*.
